# Supplementary material for: Anti-Inflammatory Constituents from Bidens frondosa
Source: PubMed Central journal article supplement (PMC6332032; doi:10.3390/molecules201018496), 2015-10-09
Supplement: molecules-20-18496-s001.pdf [file molecules-20-18496-s001.pdf]

## Supplementary Material

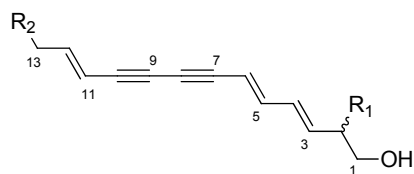

**R<sub>1</sub>**  
**1** O-β-glu  
**1a** OH

**R<sub>2</sub>**  
**OH**  
**O-β-glu**

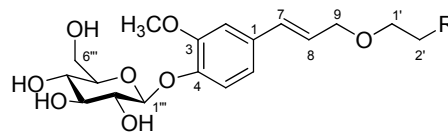

**R**  
**2** OCH<sub>2</sub>CH<sub>2</sub>CH<sub>2</sub>CH<sub>3</sub>  
**2a** H

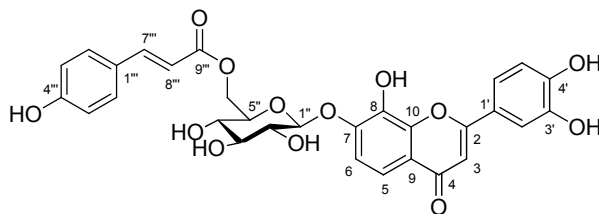

**3**

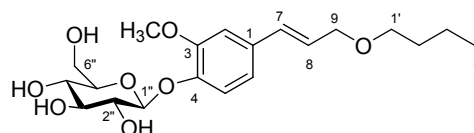

**4**

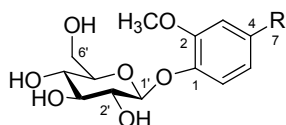

**R**  
**5** CH<sub>2</sub>CHCH<sub>2</sub>  
**6** CH<sub>2</sub>CH<sub>2</sub>OH

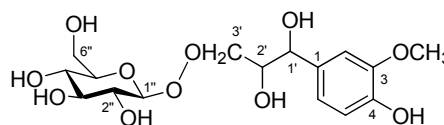

**7**

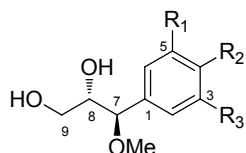

**R<sub>1</sub>** **R<sub>2</sub>** **R<sub>3</sub>**  
**8** OH H OMe  
**9** OMe OH H

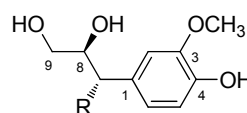

**R**  
**10** H  
**11** OH

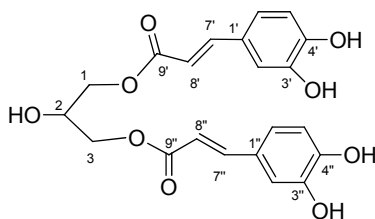

**12**

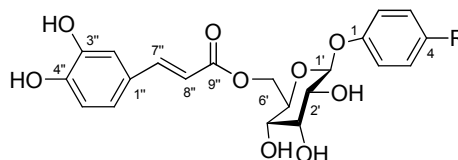

**R**  
**13** OH  
**14** CH<sub>3</sub>CO

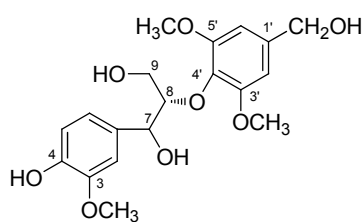

**15**

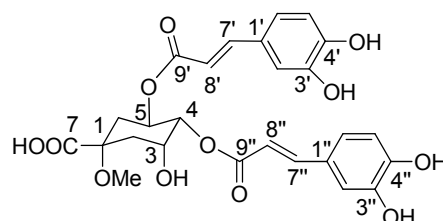

**16**

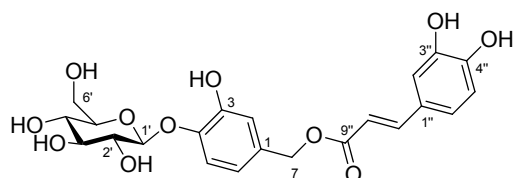

**17**

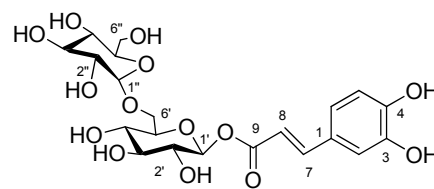

**18**

Figure S1. Cont.

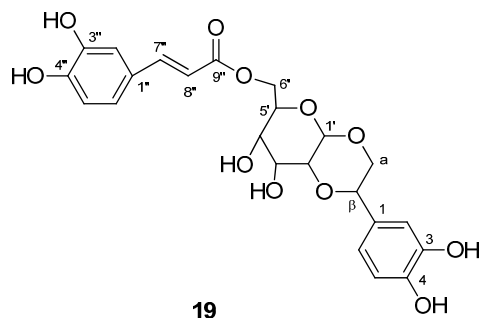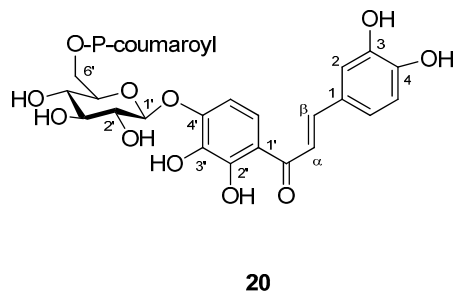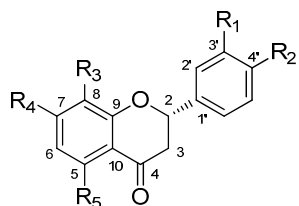

|           | R <sub>1</sub> | R <sub>2</sub> | R <sub>3</sub> | R <sub>4</sub> | R <sub>5</sub> |
|-----------|----------------|----------------|----------------|----------------|----------------|
| <b>21</b> | OH             | OMe            | OH             | OGlu-6"-O-Ac   | H              |
| <b>22</b> | OH             | OMe            | OH             | OGlu           | H              |
| <b>23</b> | OMe            | OH             | H              | OGlu           | OH             |

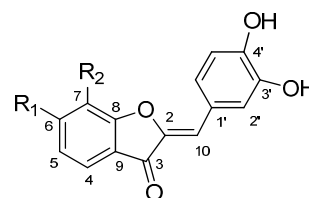

|           | R <sub>1</sub> | R <sub>2</sub> |
|-----------|----------------|----------------|
| <b>32</b> | OH             | OGlu-6"-O-Ac   |
| <b>33</b> | OGlu           | H              |
| <b>34</b> | OH             | OGlu           |

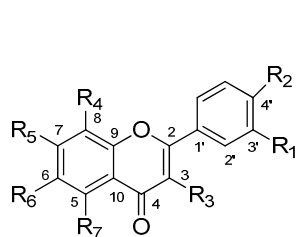

|           | R <sub>1</sub> | R <sub>2</sub> | R <sub>3</sub> | R <sub>4</sub> | R <sub>5</sub>            | R <sub>6</sub> | R <sub>7</sub> |
|-----------|----------------|----------------|----------------|----------------|---------------------------|----------------|----------------|
| <b>24</b> | H              | OH             | H              | H              | OH                        | H              | OH             |
| <b>25</b> | OH             | OH             | H              | H              | OGlu-6"-O-protocatechuoyl | OH             | OH             |
| <b>26</b> | OH             | OH             | OGlu           | H              | OH                        | H              | OH             |
| <b>27</b> | OH             | OH             | H              | OH             | OGlu                      | H              | H              |
| <b>28</b> | OH             | OH             | H              | H              | OGlu                      | H              | OH             |
| <b>29</b> | OH             | OH             | H              | H              | OGlu                      | OH             | OH             |
| <b>30</b> | OH             | OH             | H              | H              | OGlu-3"-O-HMG-ester       | OH             | OH             |
| <b>31</b> | OH             | OH             | H              | H              | OGlu-6"-O-Glu             | H              | OH             |

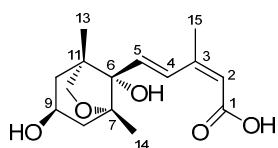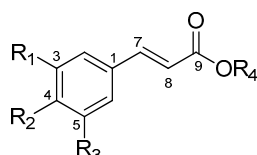

|           | R <sub>1</sub> | R <sub>2</sub> | R <sub>3</sub> | R <sub>4</sub>                  |
|-----------|----------------|----------------|----------------|---------------------------------|
| <b>36</b> | OH             | OH             | H              | H                               |
| <b>37</b> | OH             | OMe            | H              | CH <sub>2</sub> CH <sub>3</sub> |

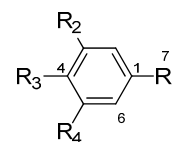

|           | R <sub>1</sub> | R <sub>2</sub> | R <sub>3</sub> | R <sub>4</sub> |
|-----------|----------------|----------------|----------------|----------------|
| <b>38</b> | COOH           | OH             | OH             | H              |
| <b>39</b> | OMe            | OMe            | H              | OMe            |
| <b>40</b> | CHO            | H              | OMe            | OH             |

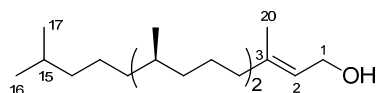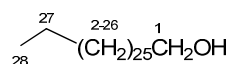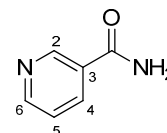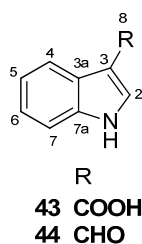

|           |      |
|-----------|------|
| <b>43</b> | COOH |
| <b>44</b> | CHO  |

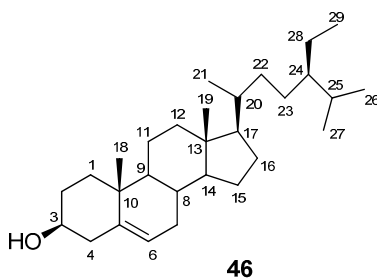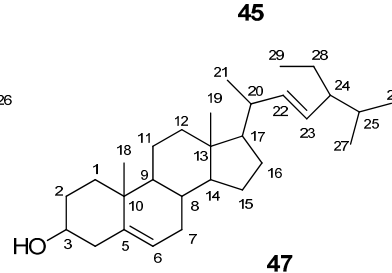

Figure S1. Cont.

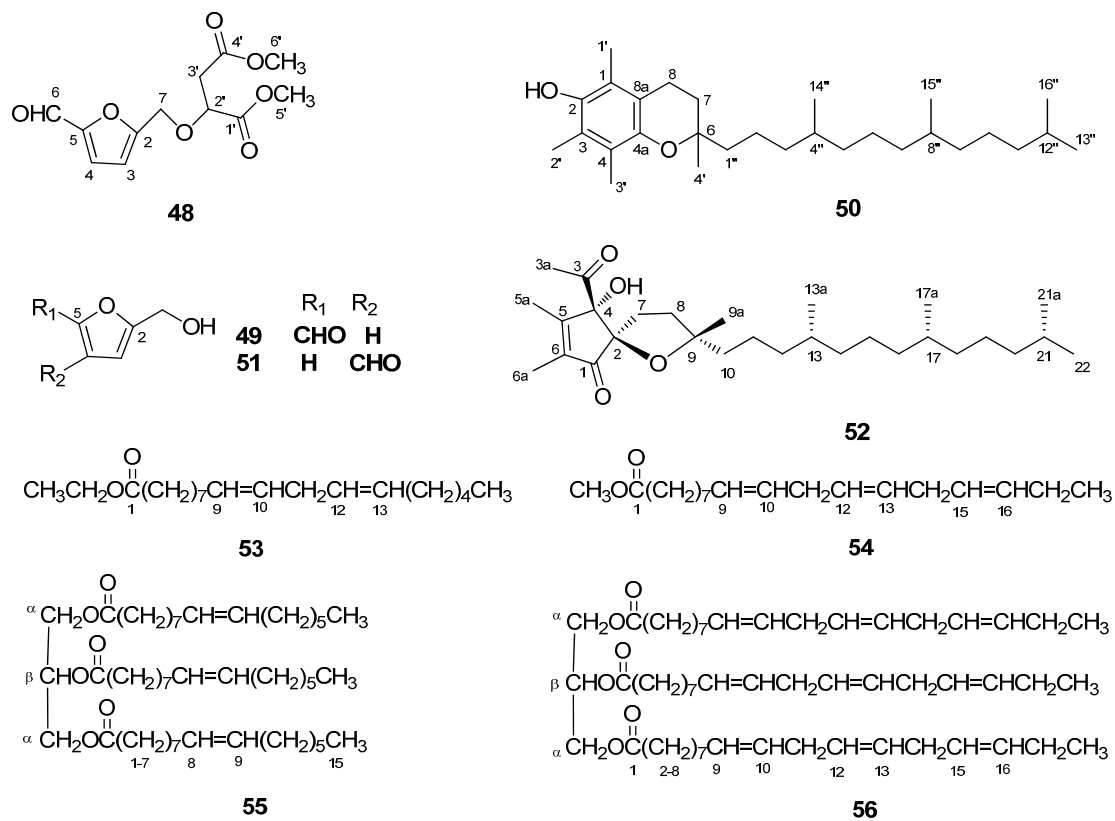

Figure S1. Structures of compounds 1–56.

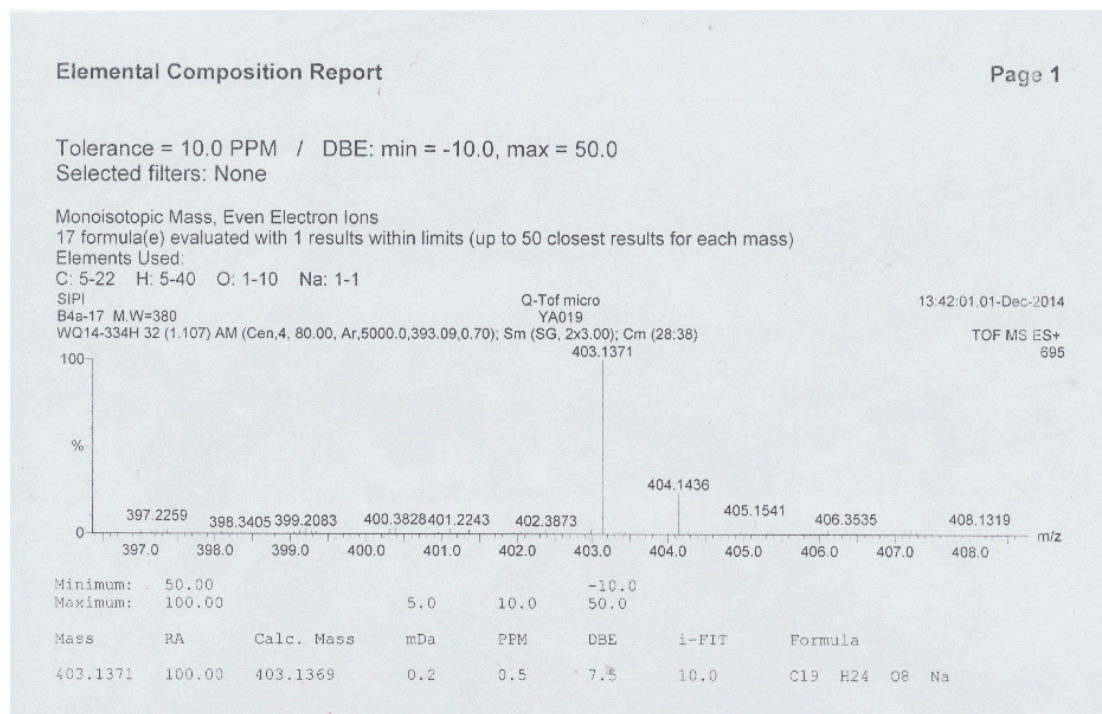

Figure S2. HRESI mass spectrum of compound 1.

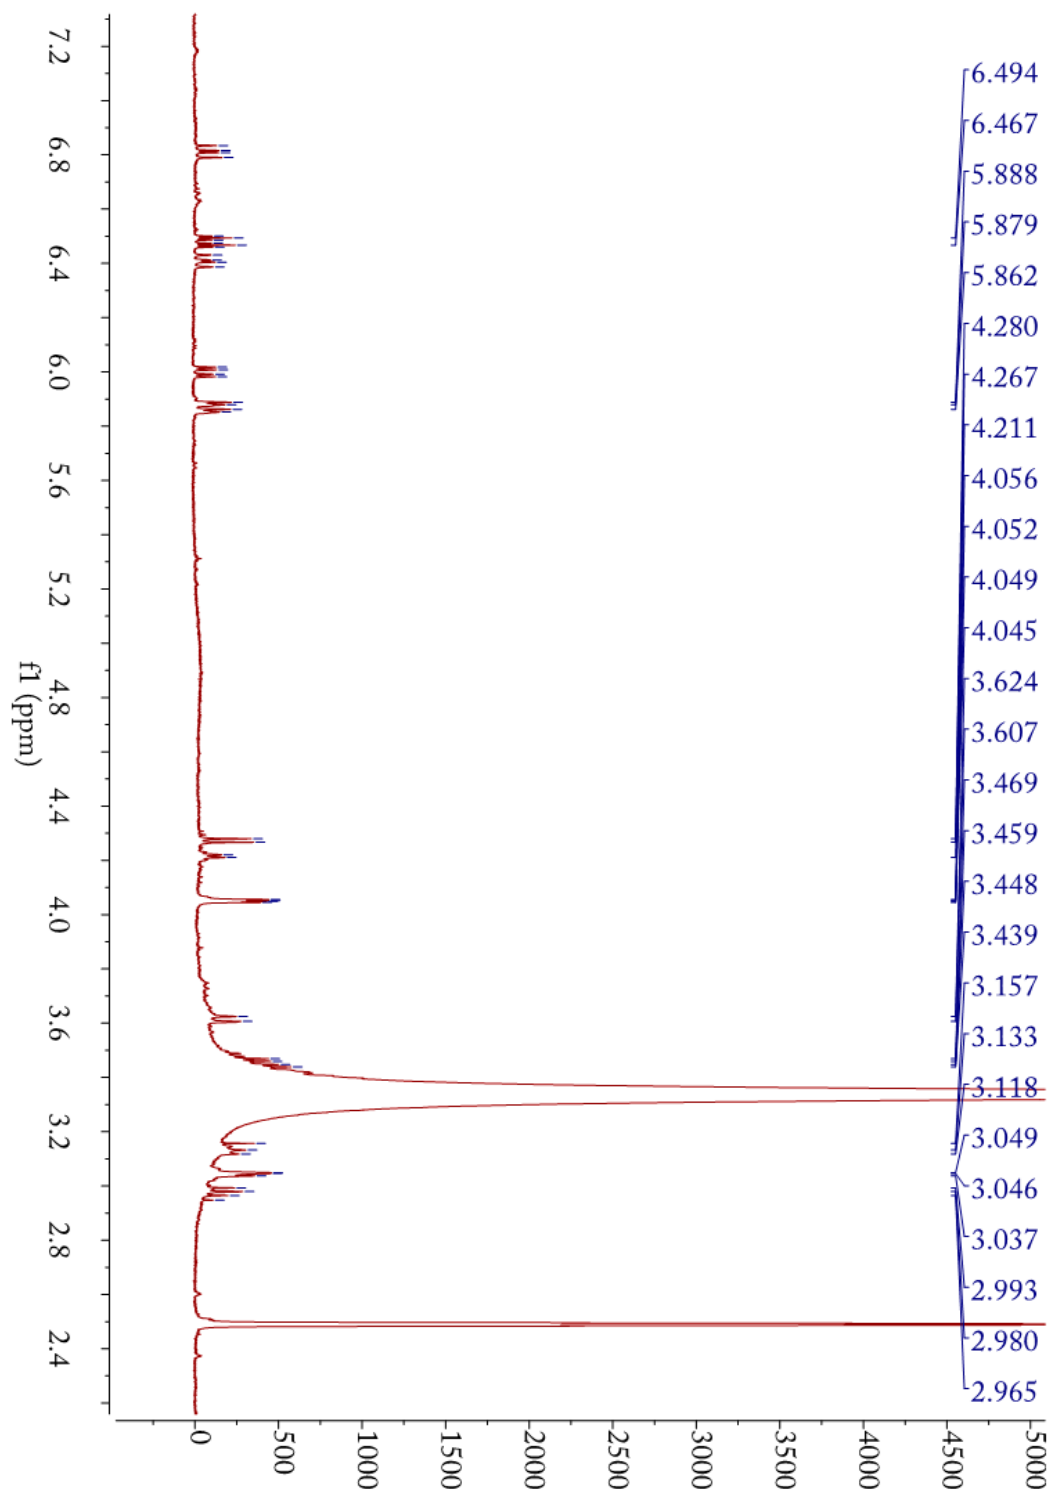

**Figure S3.**  $^1\text{H-NMR}$  spectrum of compound **1** (600 MHz, in  $\text{DMSO-}d_6$ ).

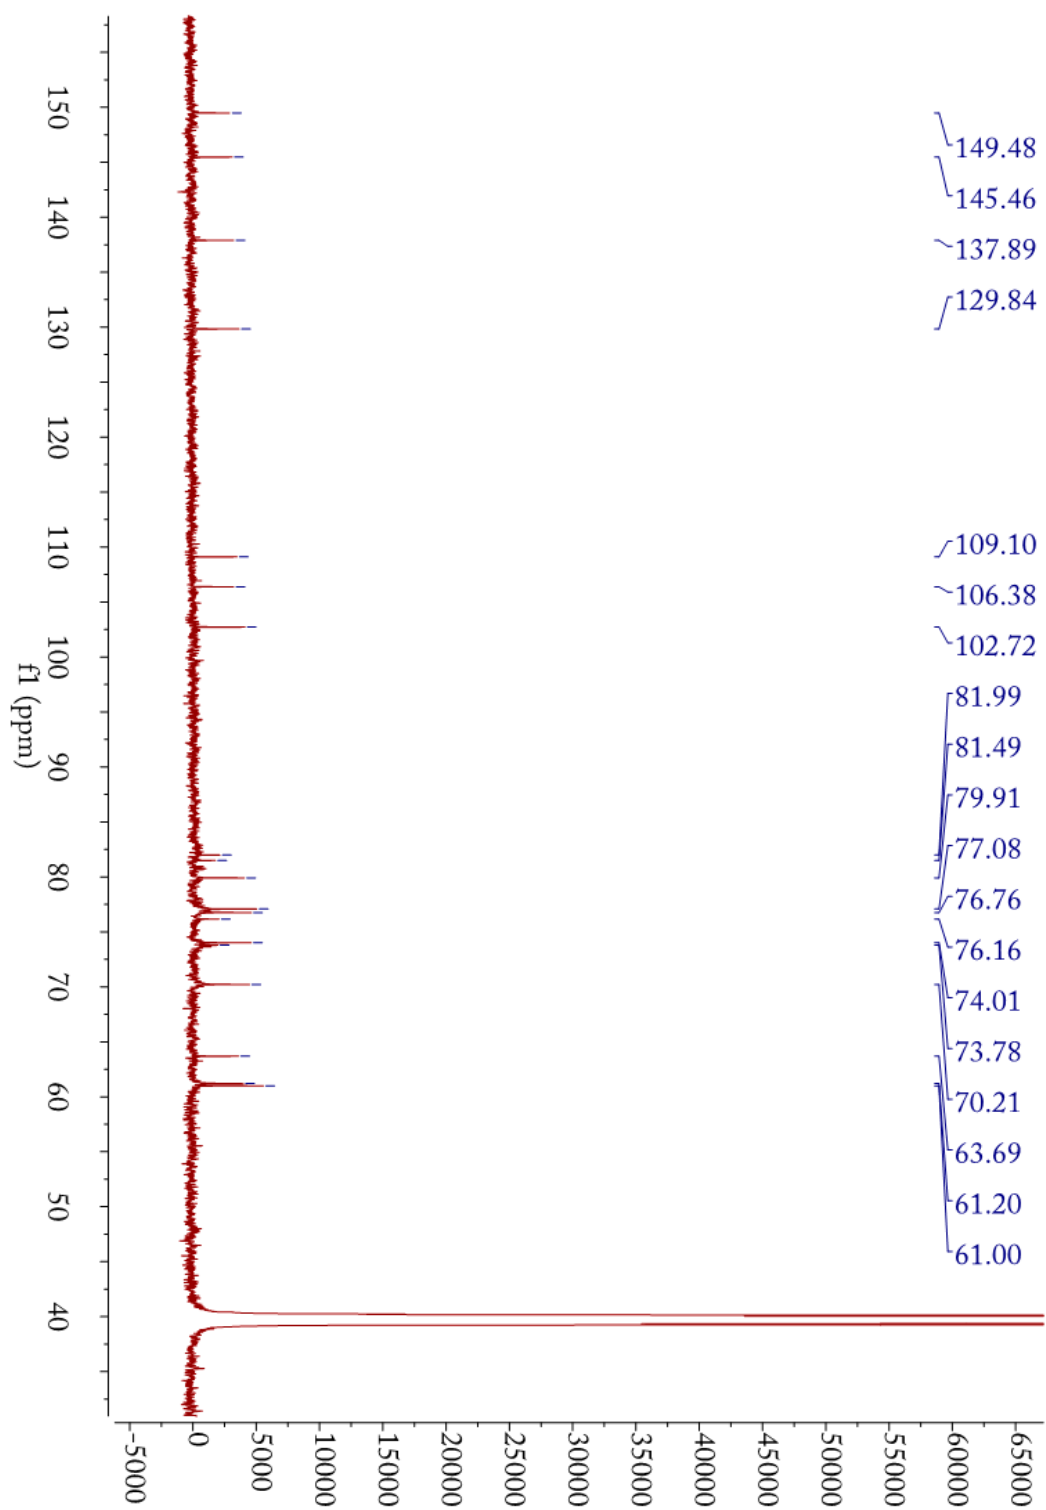

**Figure S4.**  $^{13}\text{C}$ -NMR spectrum of compound **1** (150 MHz, in  $\text{DMSO-}d_6$ ).

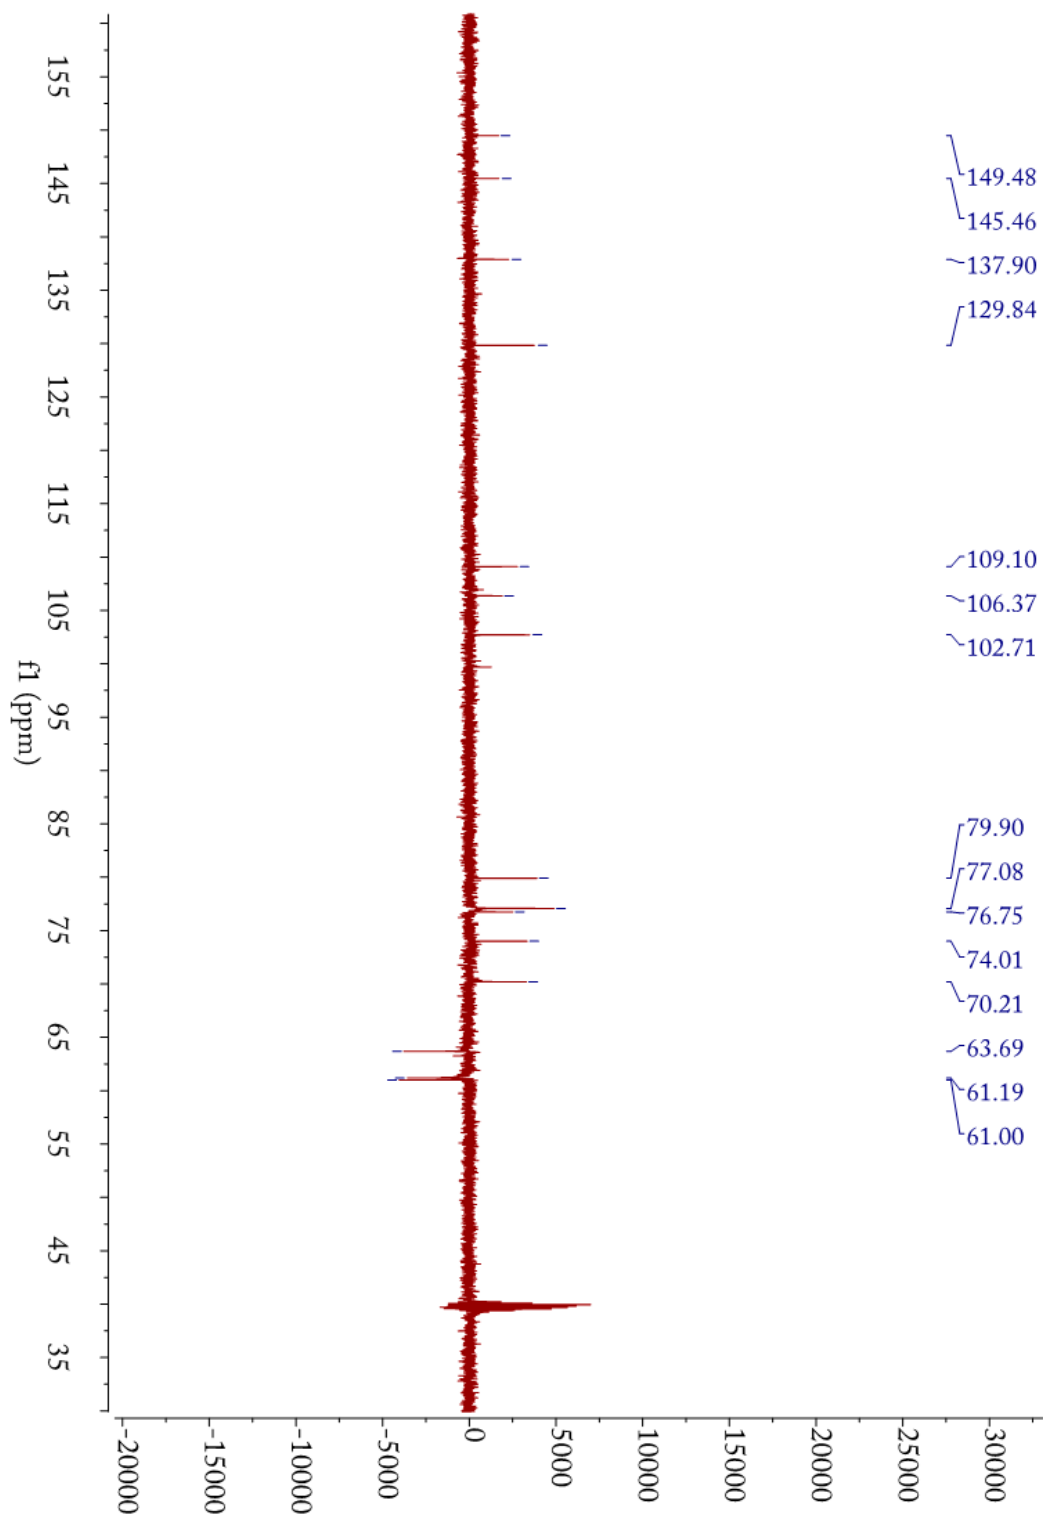

**Figure S5.** DEPT spectrum of compound **1** (150 MHz, in DMSO-*d*<sub>6</sub>).

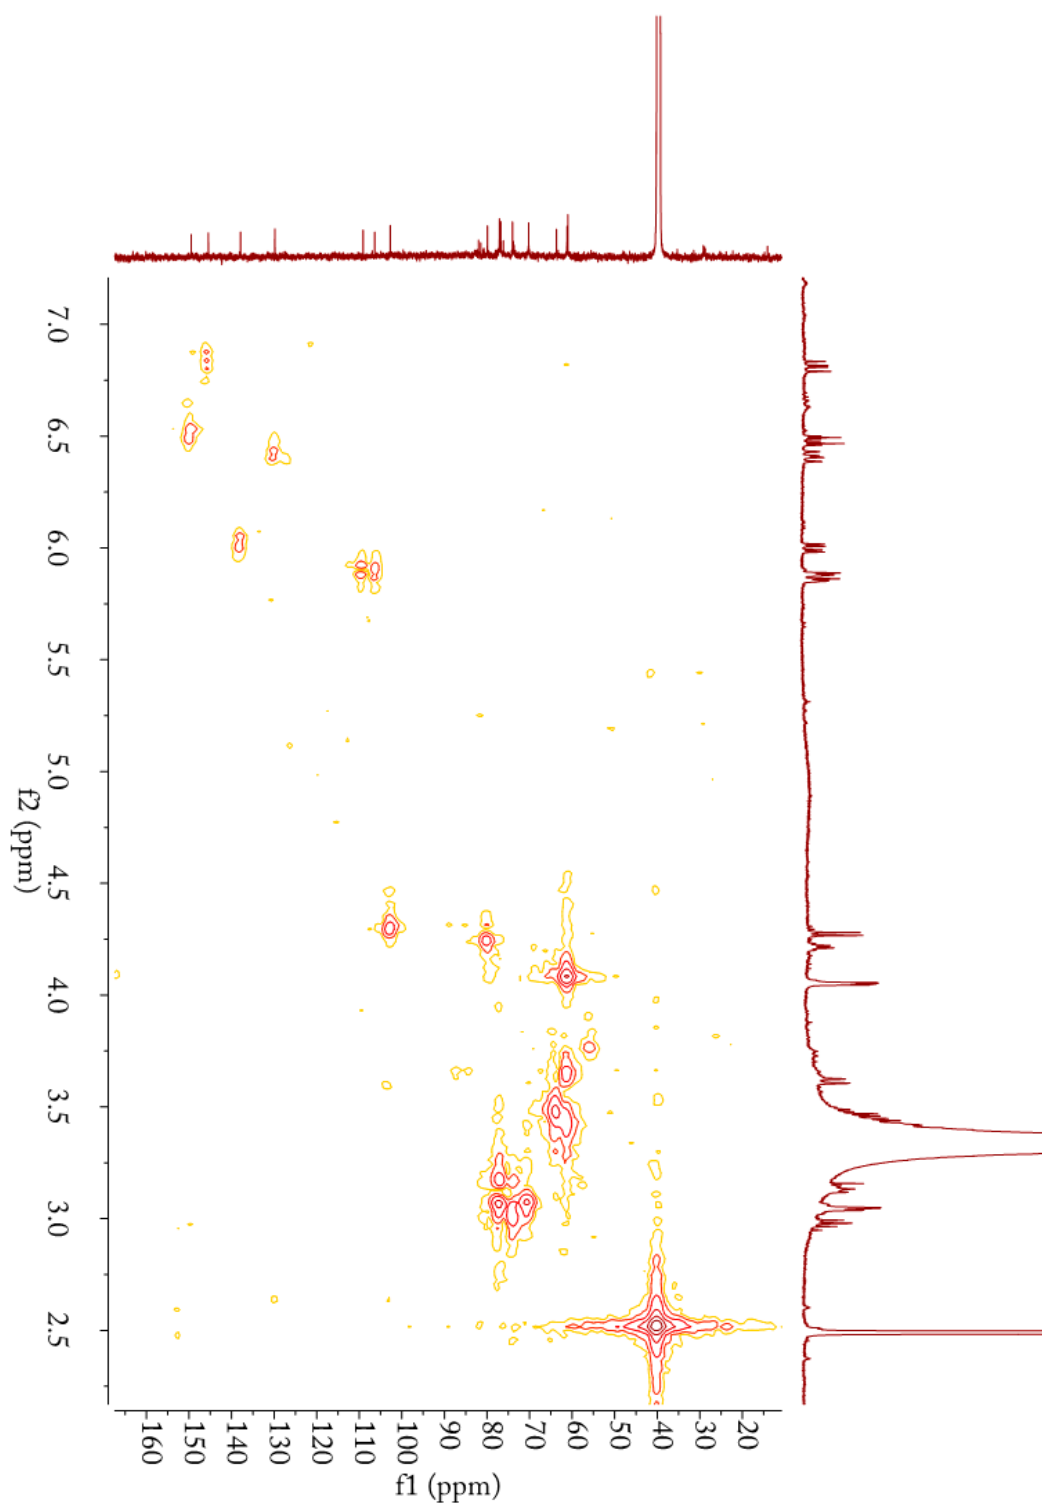

**Figure S6.** HSQC spectrum of compound **1** (600 MHz, in DMSO-*d*<sub>6</sub>).

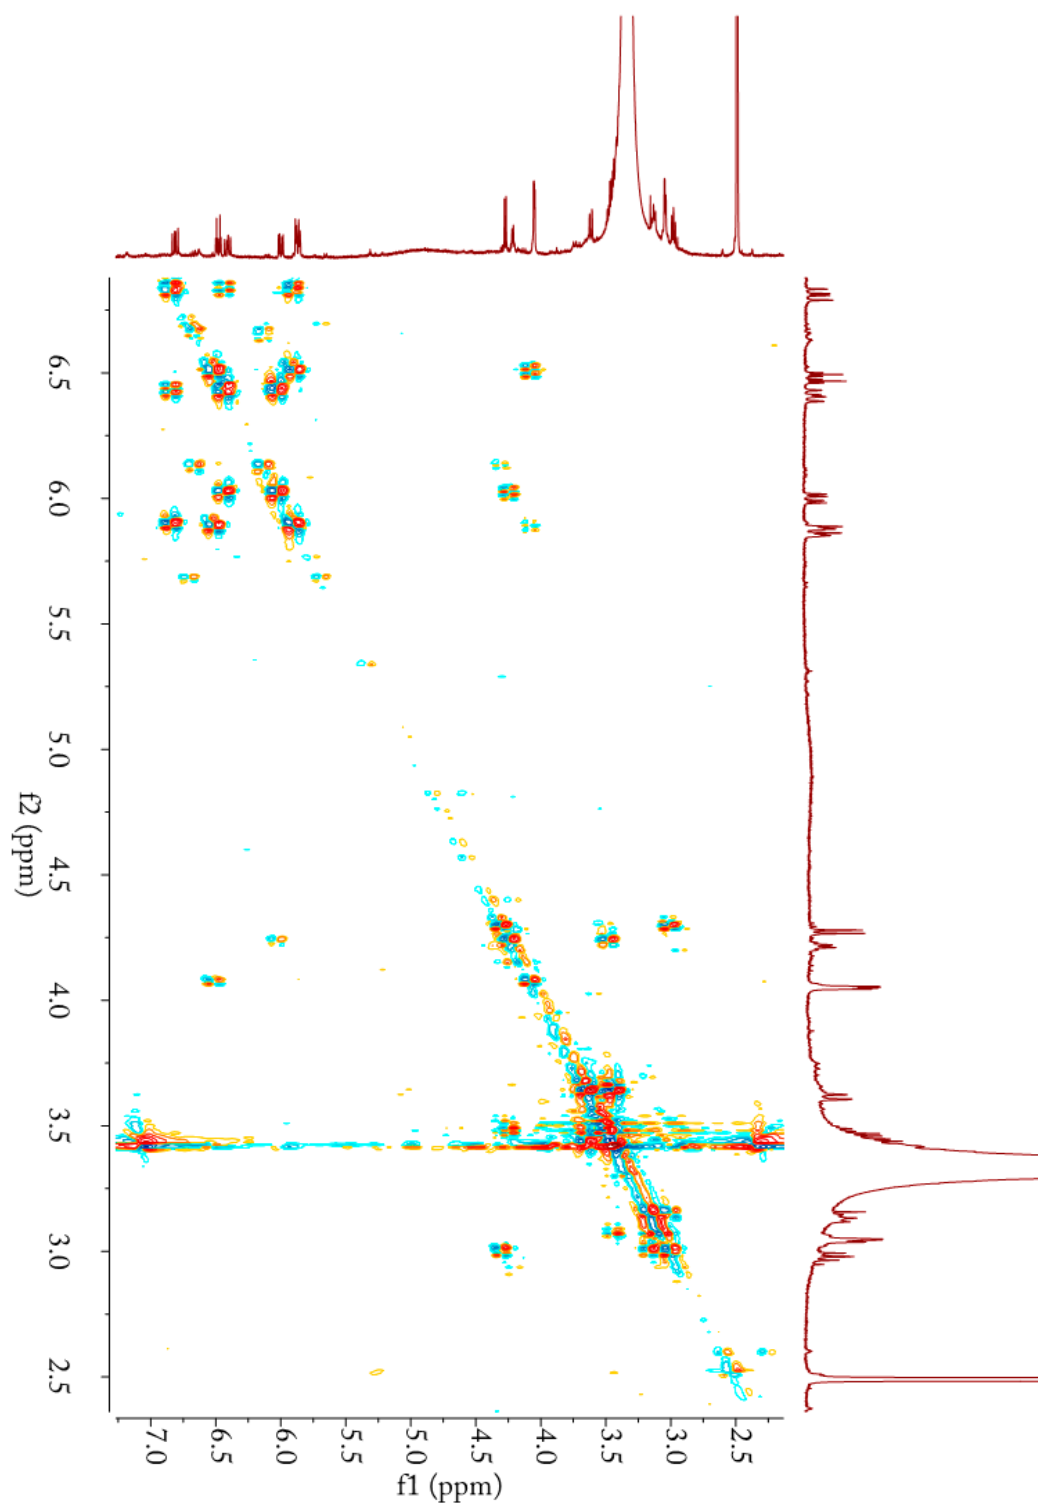

**Figure S7.**  $^1\text{H}$ - $^1\text{H}$  COSY spectrum of compound **1** (600 MHz, in  $\text{DMSO-}d_6$ ).



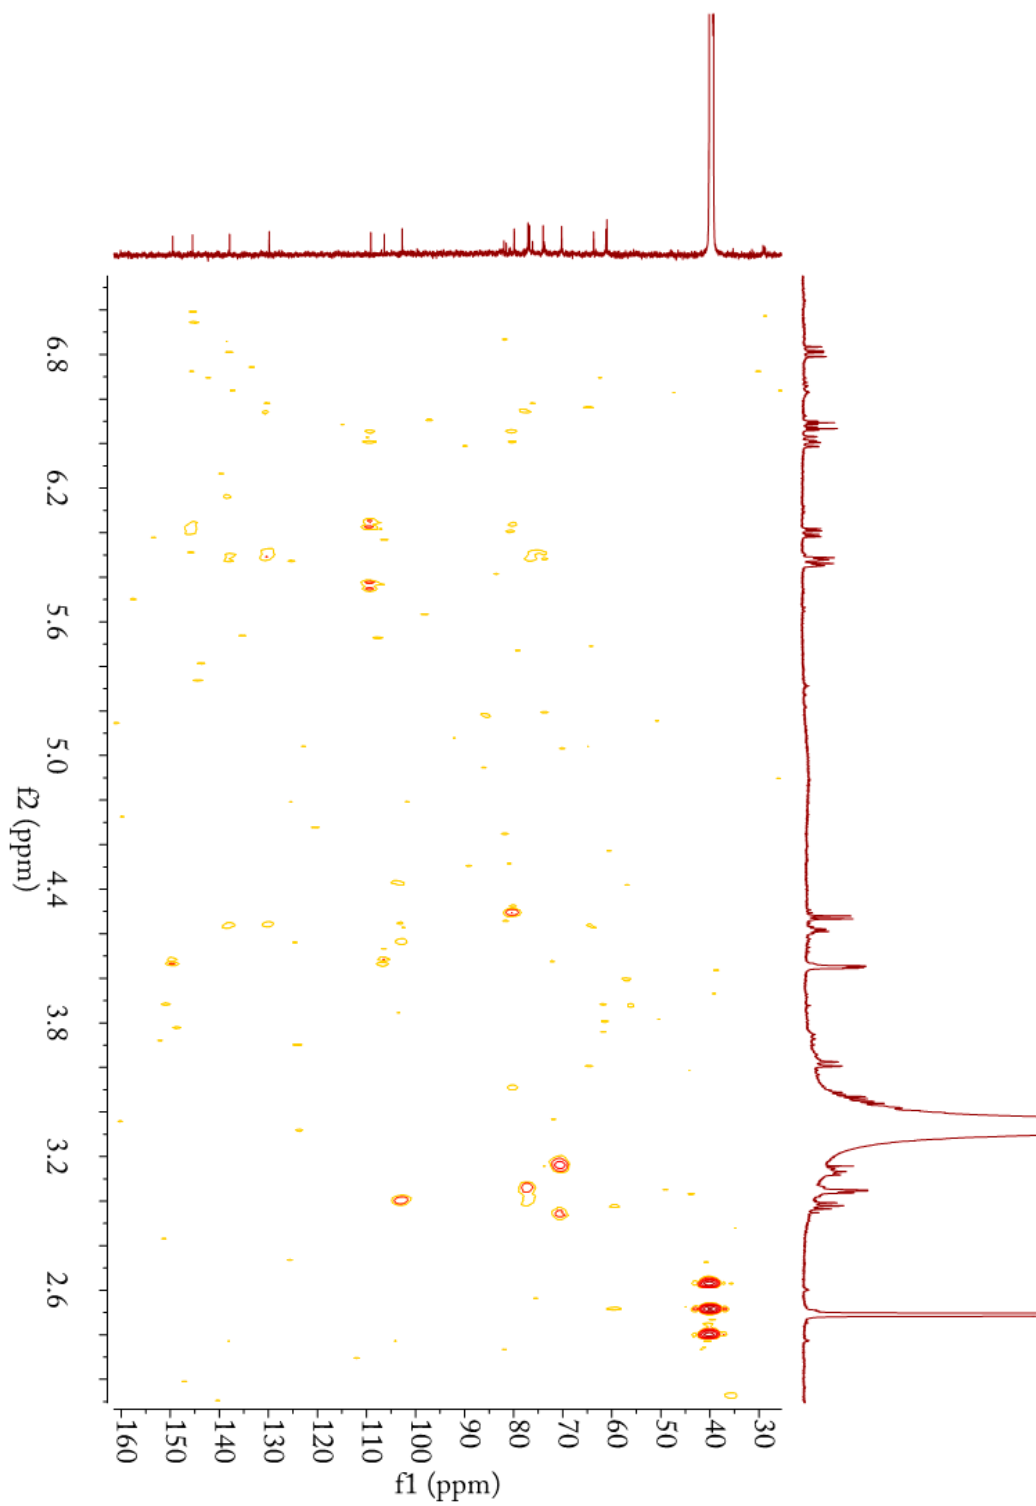

**Figure S8.** HMBC spectrum of compound **1** (600 MHz, in  $\text{DMSO-}d_6$ ).

## Qualitative Analysis Report

|                               |                  |                      |                       |
|-------------------------------|------------------|----------------------|-----------------------|
| <b>Data Filename</b>          | BFM-ZAO.d        | <b>Sample Name</b>   | BFM-ZAO               |
| <b>Sample Type</b>            | Sample           | <b>Position</b>      | P1-D7                 |
| <b>Instrument Name</b>        | Instrument 1     | <b>User Name</b>     |                       |
| <b>Acq Method</b>             | TEST-POS-01-WL.m | <b>Acquired Time</b> | 11/11/2014 4:26:53 PM |
| <b>IRM Calibration Status</b> | Success          | <b>DA Method</b>     | Default.m             |
| <b>Comment</b>                |                  |                      |                       |
| <b>Data Filename</b>          | BFM-ZAO-NEG.d    | <b>Sample Name</b>   | BFM-ZAO               |
| <b>Sample Type</b>            | Sample           | <b>Position</b>      | P1-D7                 |
| <b>Instrument Name</b>        | Instrument 1     | <b>User Name</b>     |                       |
| <b>Acq Method</b>             | TEST-NEG-01-WL.m | <b>Acquired Time</b> | 11/11/2014 4:58:04 PM |
| <b>IRM Calibration Status</b> | Success          | <b>DA Method</b>     | Default.m             |
| <b>Comment</b>                |                  |                      |                       |

### User Spectra

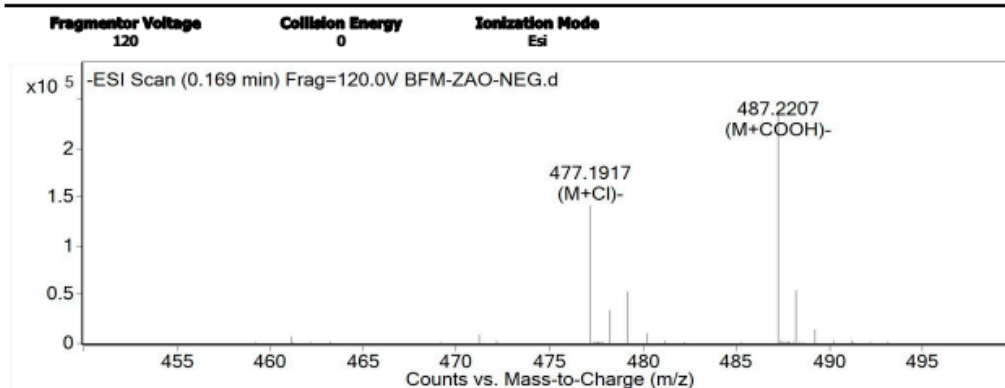

#### Peak List

| m/z       | z | Abund  | Formula       | Ion       |
|-----------|---|--------|---------------|-----------|
| 68.9962   |   | 96757  |               |           |
| 112.9858  |   | 179609 |               |           |
| 477.1917  | 1 | 142017 | C22 H34 Cl O9 | (M+Cl)-   |
| 479.1905  | 1 | 53192  | C22 H34 Cl O9 | (M+Cl)-   |
| 487.2207  | 1 | 239659 | C23 H35 O11   | (M+COOH)- |
| 488.2235  | 1 | 53870  | C23 H35 O11   | (M+COOH)- |
| 955.9719  | 1 | 100294 |               |           |
| 966.0007  |   | 50450  |               |           |
| 982.9899  |   | 50093  |               |           |
| 1033.9868 |   | 33735  |               |           |

#### Formula Calculator Element Limits

| Element | Min | Max |
|---------|-----|-----|
| C       | 3   | 60  |
| H       | 0   | 120 |
| O       | 0   | 20  |

#### Formula Calculator Results

| Formula    | Best | Mass     | Tgt Mass | Diff (ppm) | Ion Species   | Score |
|------------|------|----------|----------|------------|---------------|-------|
| C22 H34 O9 | TRUE | 442.2223 | 442.2203 | -4.64      | C22 H34 Cl O9 | 90.72 |
| C22 H34 O9 | TRUE | 442.2225 | 442.2203 | -5.02      | C23 H35 O11   | 88    |

--- End Of Report ---

Figure S9. HRESI mass spectrum of compound 2.

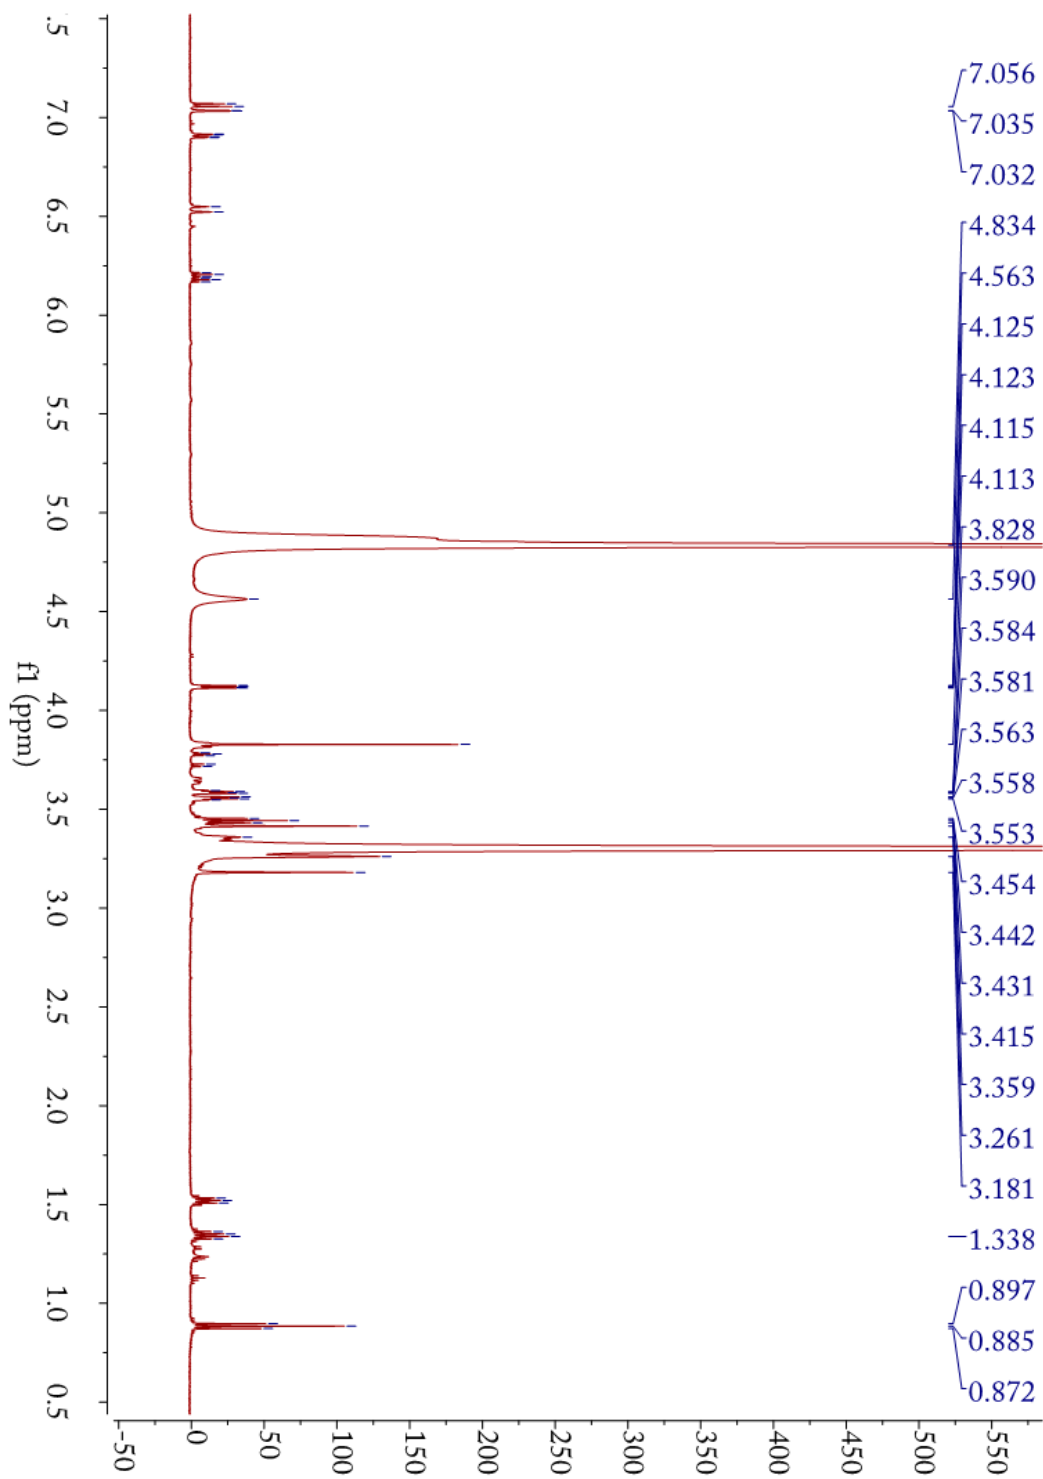

**Figure S10.**  $^1\text{H-NMR}$  spectrum of compound **2** (600 MHz, in  $\text{CD}_3\text{OD}$ ).

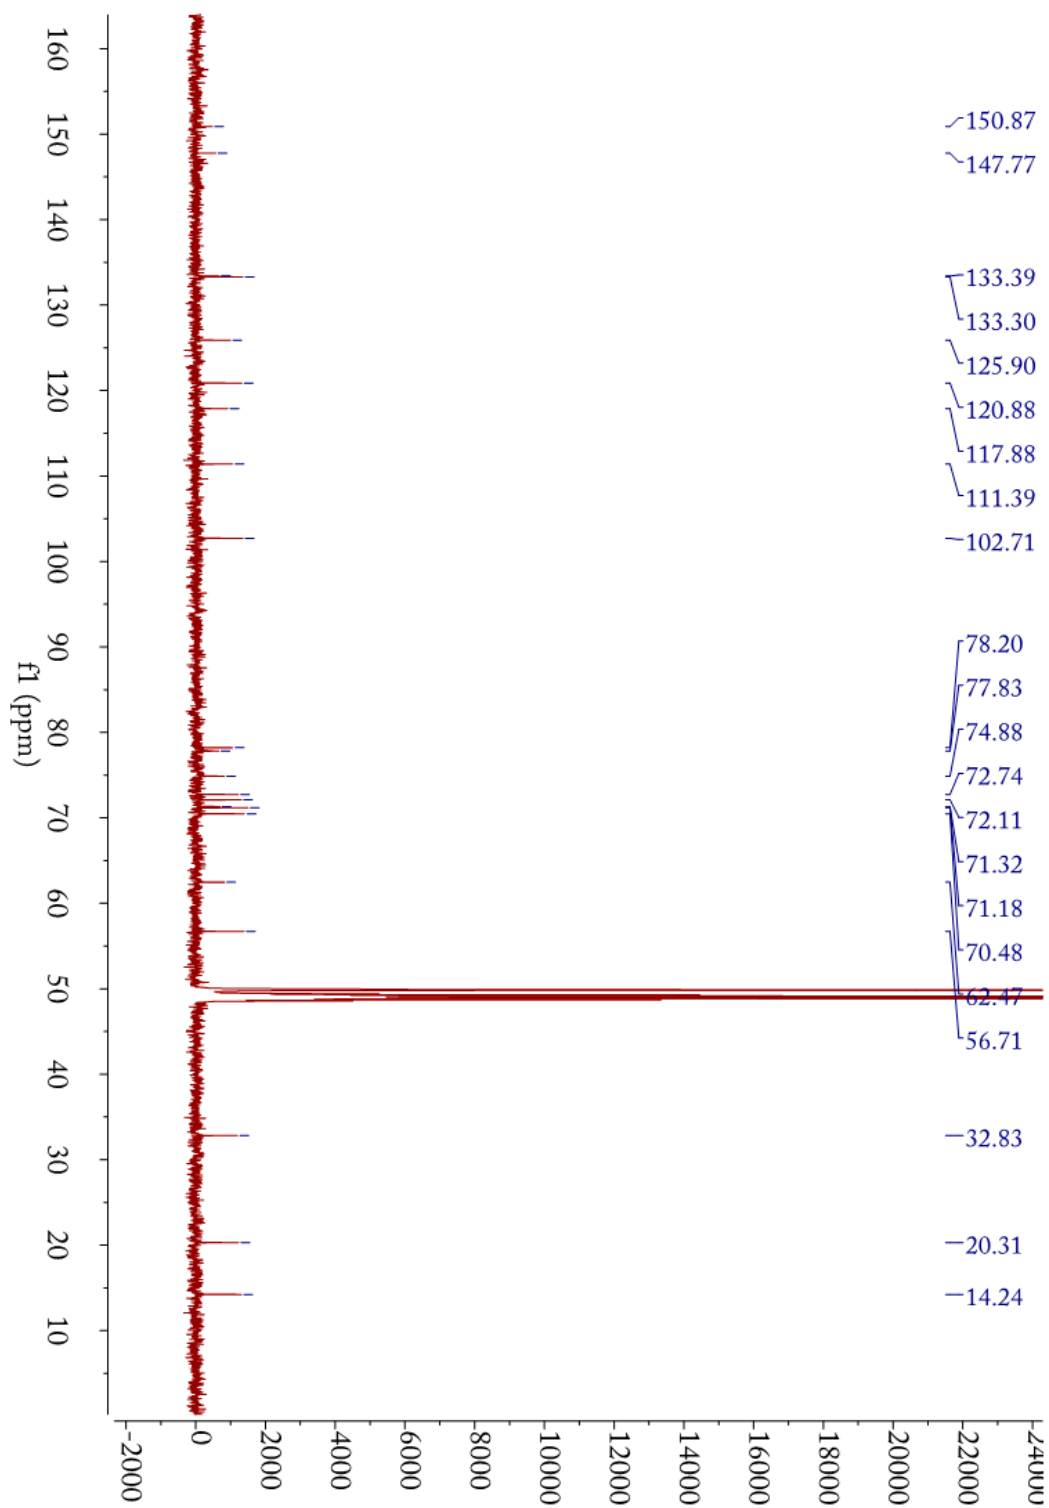

**Figure S11.**  $^{13}\text{C}$ -NMR spectrum of compound 2 (150 MHz, in  $\text{CD}_3\text{OD}$ ).

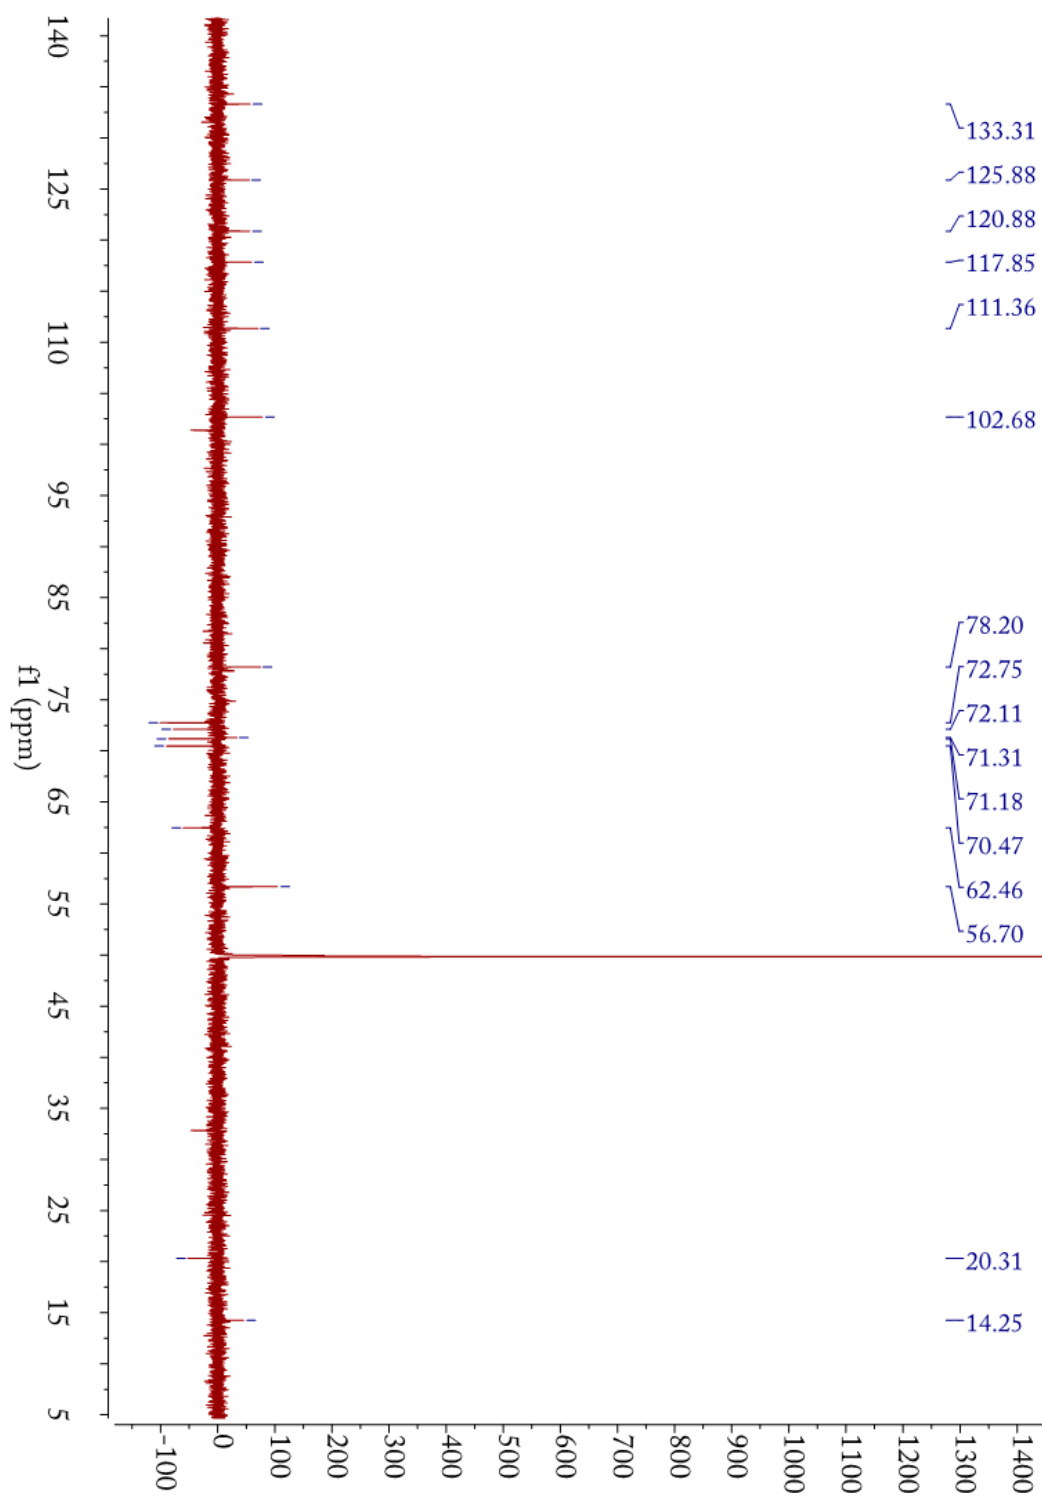

**Figure S12.** DEPT spectrum of compound **2** (150 MHz, in CD<sub>3</sub>OD).

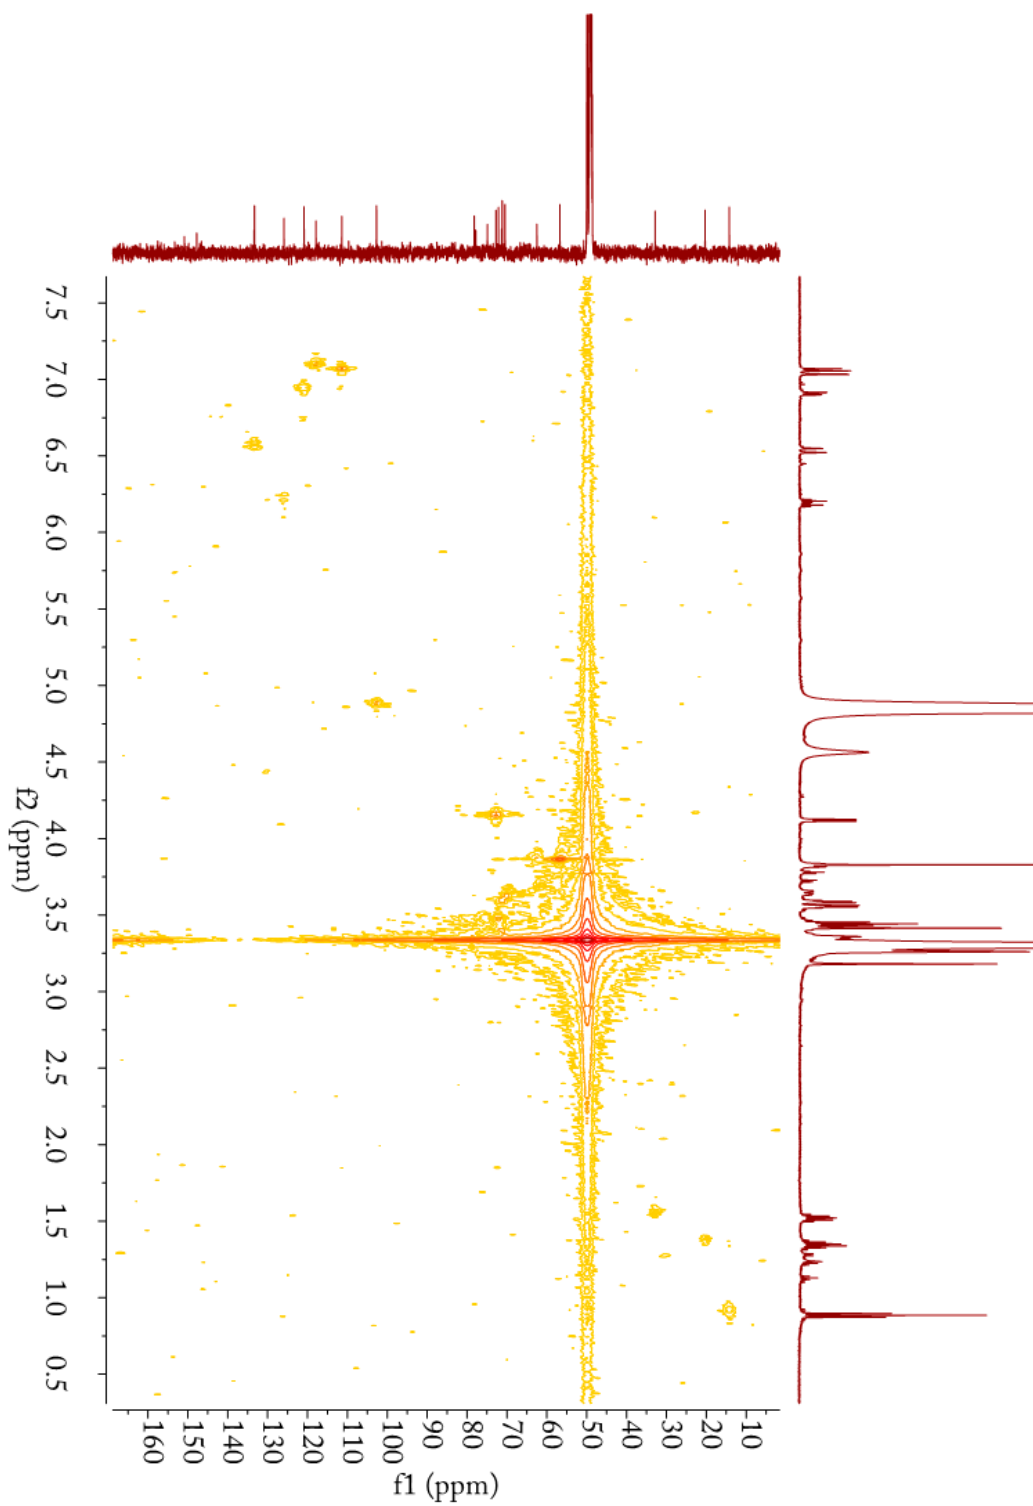

**Figure S13.** HSQC spectrum of compound **2** (600 MHz, in  $\text{CD}_3\text{OD}$ ).

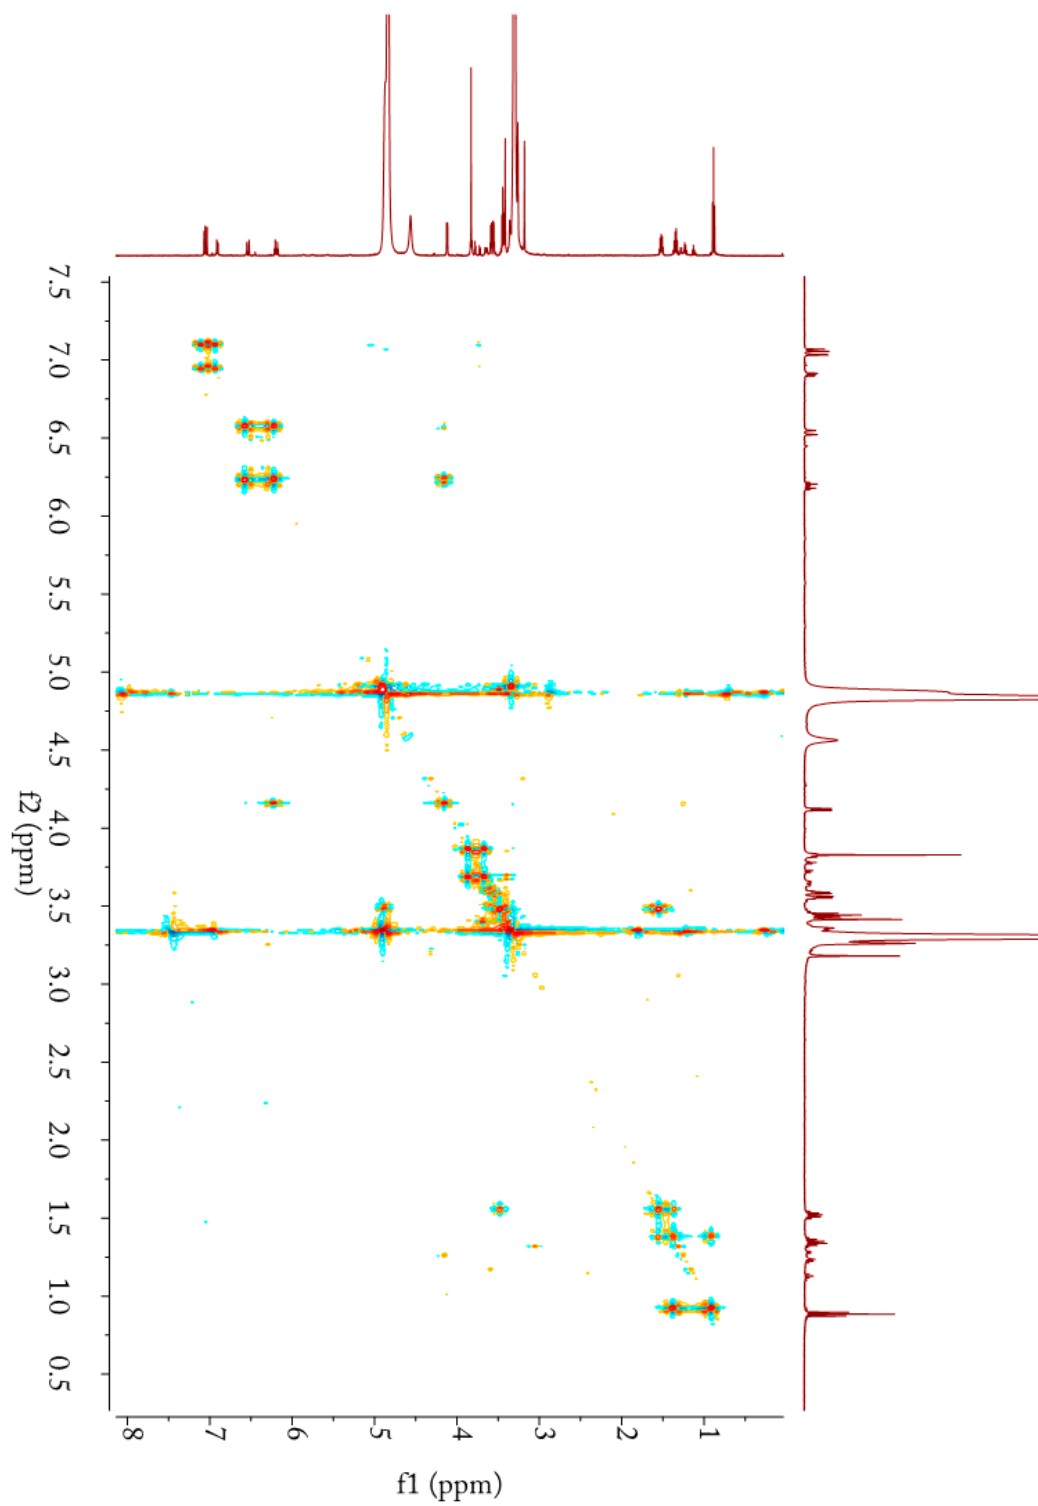

**Figure S14.**  $^1\text{H}$ - $^1\text{H}$  COSY spectrum of compound **2** (600 MHz, in  $\text{CD}_3\text{OD}$ ).

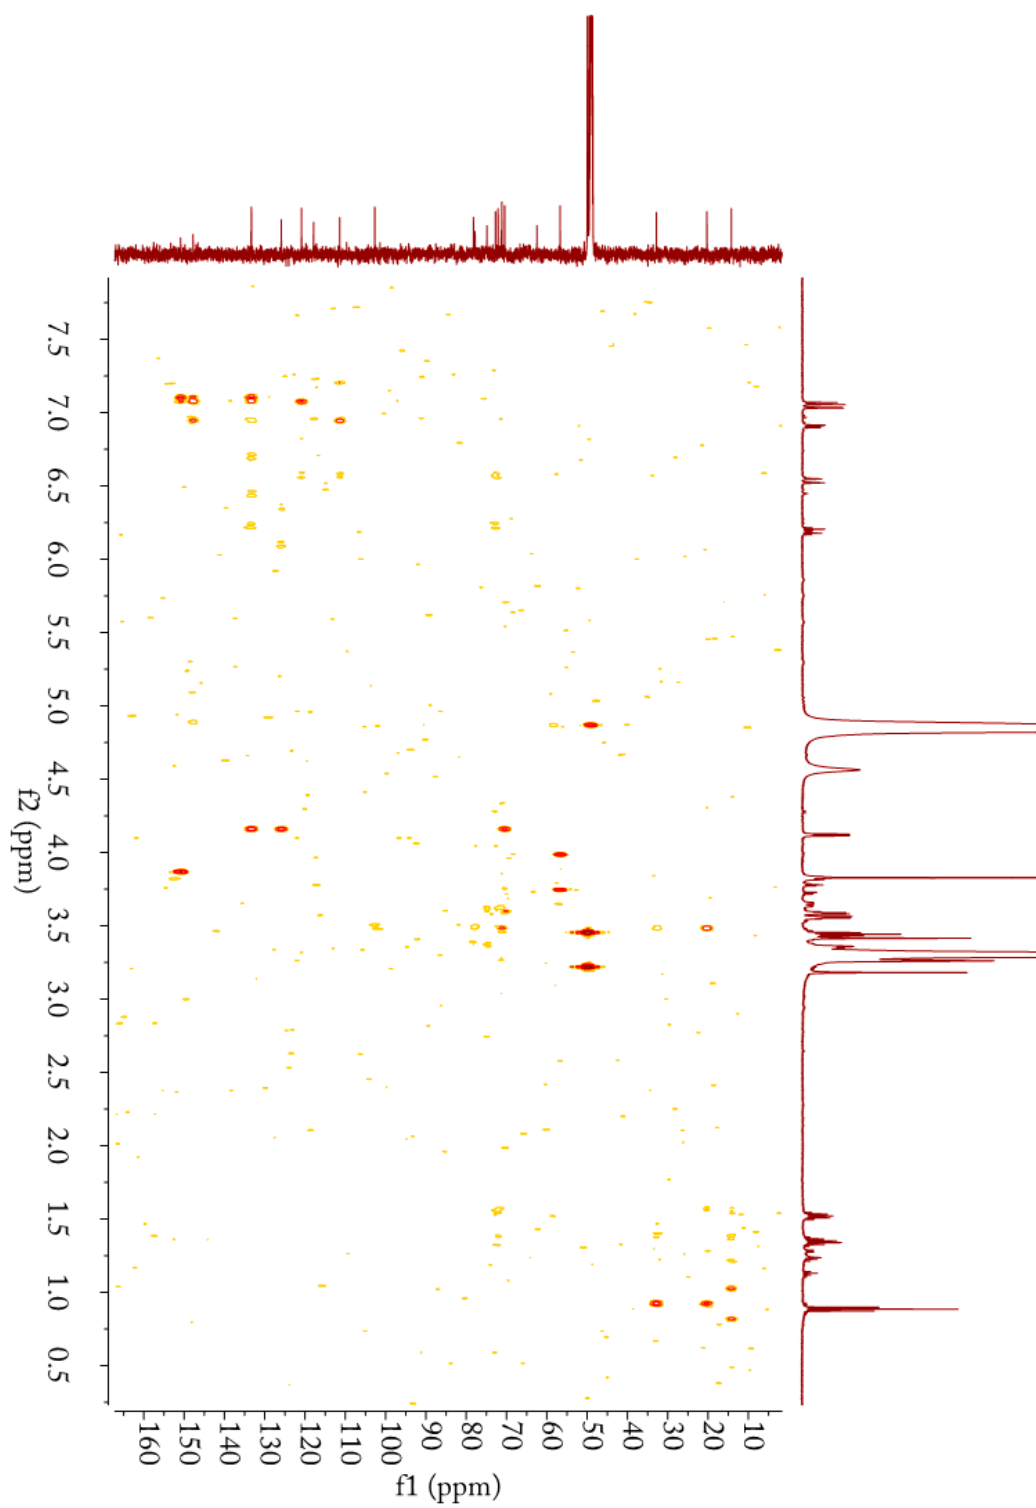

**Figure S15.** HMBC spectrum of compound **2** (600 MHz, in CD<sub>3</sub>OD).



## Qualitative Analysis Report

|                               |                  |                      |                       |
|-------------------------------|------------------|----------------------|-----------------------|
| <b>Data Filename</b>          | BFA-6.d          | <b>Sample Name</b>   | BFA-6                 |
| <b>Sample Type</b>            | Sample           | <b>Position</b>      | P1-D8                 |
| <b>Instrument Name</b>        | Instrument 1     | <b>User Name</b>     |                       |
| <b>Acq Method</b>             | TEST-POS-01-WL.m | <b>Acquired Time</b> | 11/11/2014 4:28:31 PM |
| <b>IRM Calibration Status</b> | Success          | <b>DA Method</b>     | Default.m             |
| <b>Comment</b>                |                  |                      |                       |
| <b>Data Filename</b>          | BFA-6-NEG.d      | <b>Sample Name</b>   | BFA-6                 |
| <b>Sample Type</b>            | Sample           | <b>Position</b>      | P1-D8                 |
| <b>Instrument Name</b>        | Instrument 1     | <b>User Name</b>     |                       |
| <b>Acq Method</b>             | TEST-NEG-01-WL.m | <b>Acquired Time</b> | 11/11/2014 4:59:40 PM |
| <b>IRM Calibration Status</b> | Success          | <b>DA Method</b>     | Default.m             |
| <b>Comment</b>                |                  |                      |                       |

### User Spectra

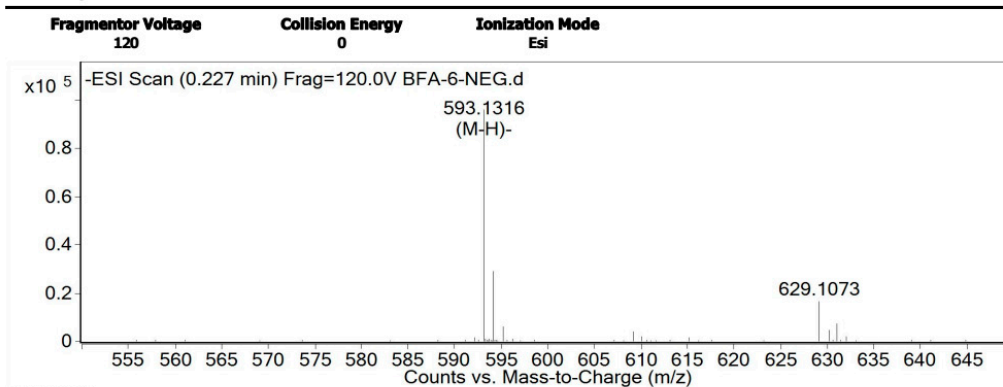

#### Peak List

| m/z       | z | Abund  | Formula     | Ion    |
|-----------|---|--------|-------------|--------|
| 68.9963   |   | 76658  |             |        |
| 112.9857  |   | 146937 |             |        |
| 160.842   |   | 22421  |             |        |
| 197.8083  |   | 20953  |             |        |
| 593.1316  | 1 | 96289  | C30 H25 O13 | (M-H)- |
| 594.1345  | 1 | 28955  | C30 H25 O13 | (M-H)- |
| 955.9712  | 1 | 56329  |             |        |
| 966.0007  | 1 | 60958  |             |        |
| 982.9909  | 1 | 71446  |             |        |
| 1033.9866 |   | 25585  |             |        |

#### Formula Calculator Element Limits

| Element | Min | Max |
|---------|-----|-----|
| C       | 3   | 60  |
| H       | 0   | 120 |
| O       | 0   | 20  |

#### Formula Calculator Results

| Formula     | Best | Mass     | Tgt Mass | Diff (ppm) | Ion Species | Score |
|-------------|------|----------|----------|------------|-------------|-------|
| C30 H26 O13 | TRUE | 594.1389 | 594.1373 | -2.64      | C30 H25 O13 | 94.26 |

|                                  |                              |                               |
|----------------------------------|------------------------------|-------------------------------|
| <b>Fragmentor Voltage</b><br>120 | <b>Collision Energy</b><br>0 | <b>Ionization Mode</b><br>Esi |
|----------------------------------|------------------------------|-------------------------------|

Figure S16. HRESI mass spectrum of compound 3.

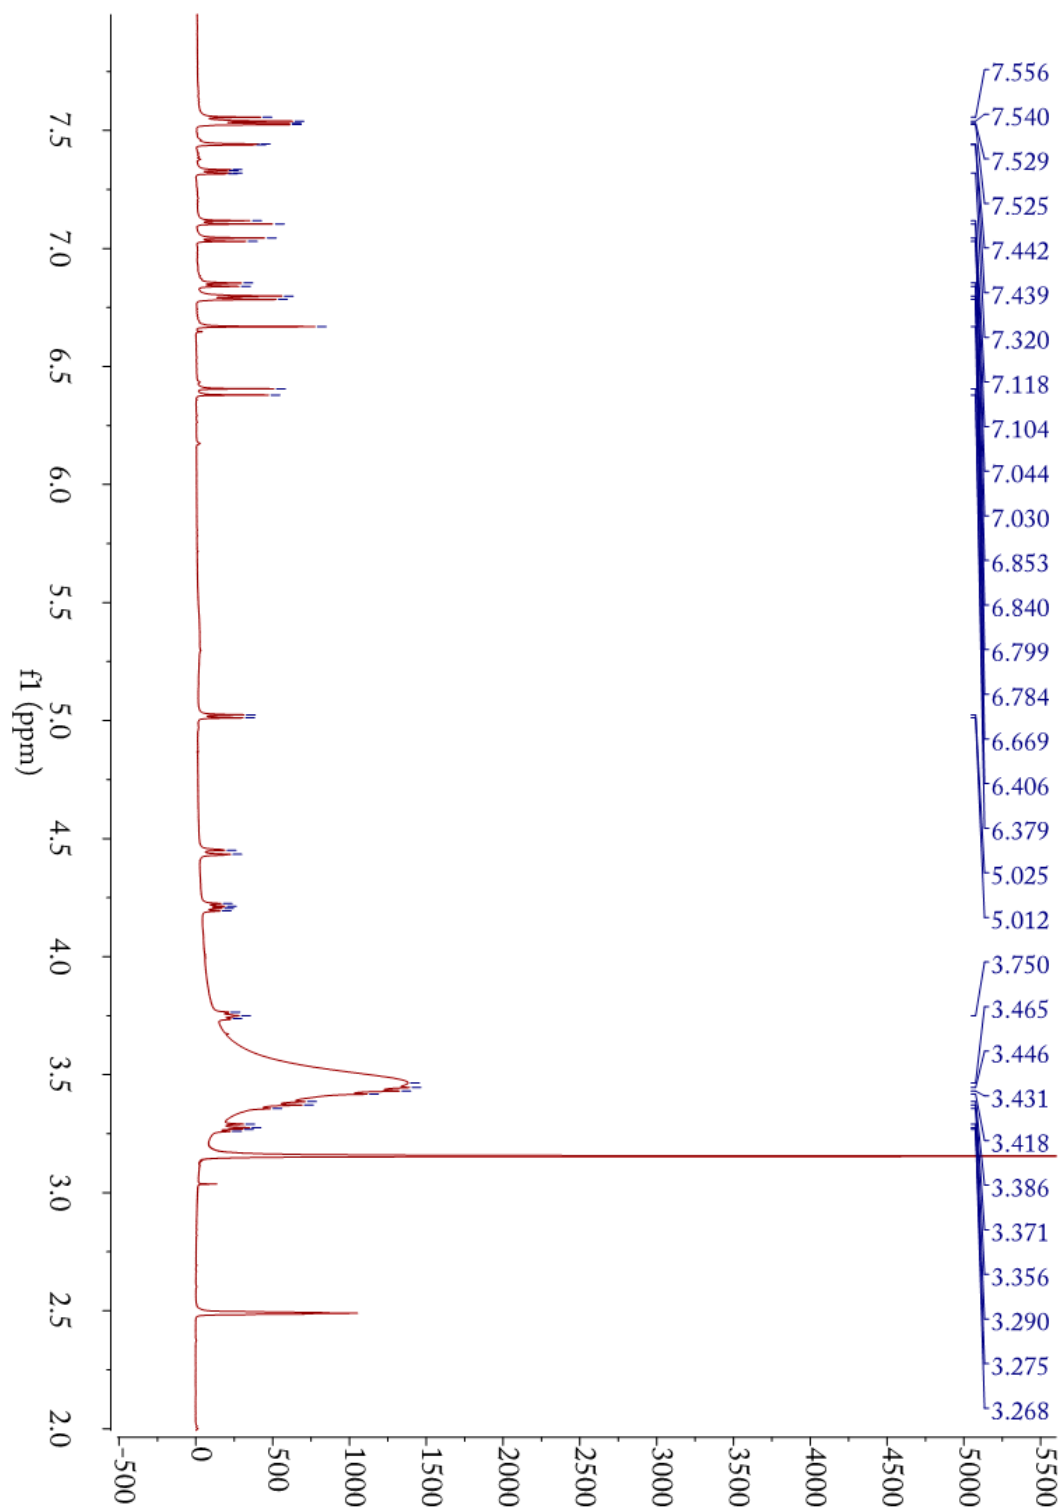

**Figure S17.**  $^1\text{H-NMR}$  spectrum of compound **3** (600 MHz, in  $\text{DMSO-}d_6$ ).

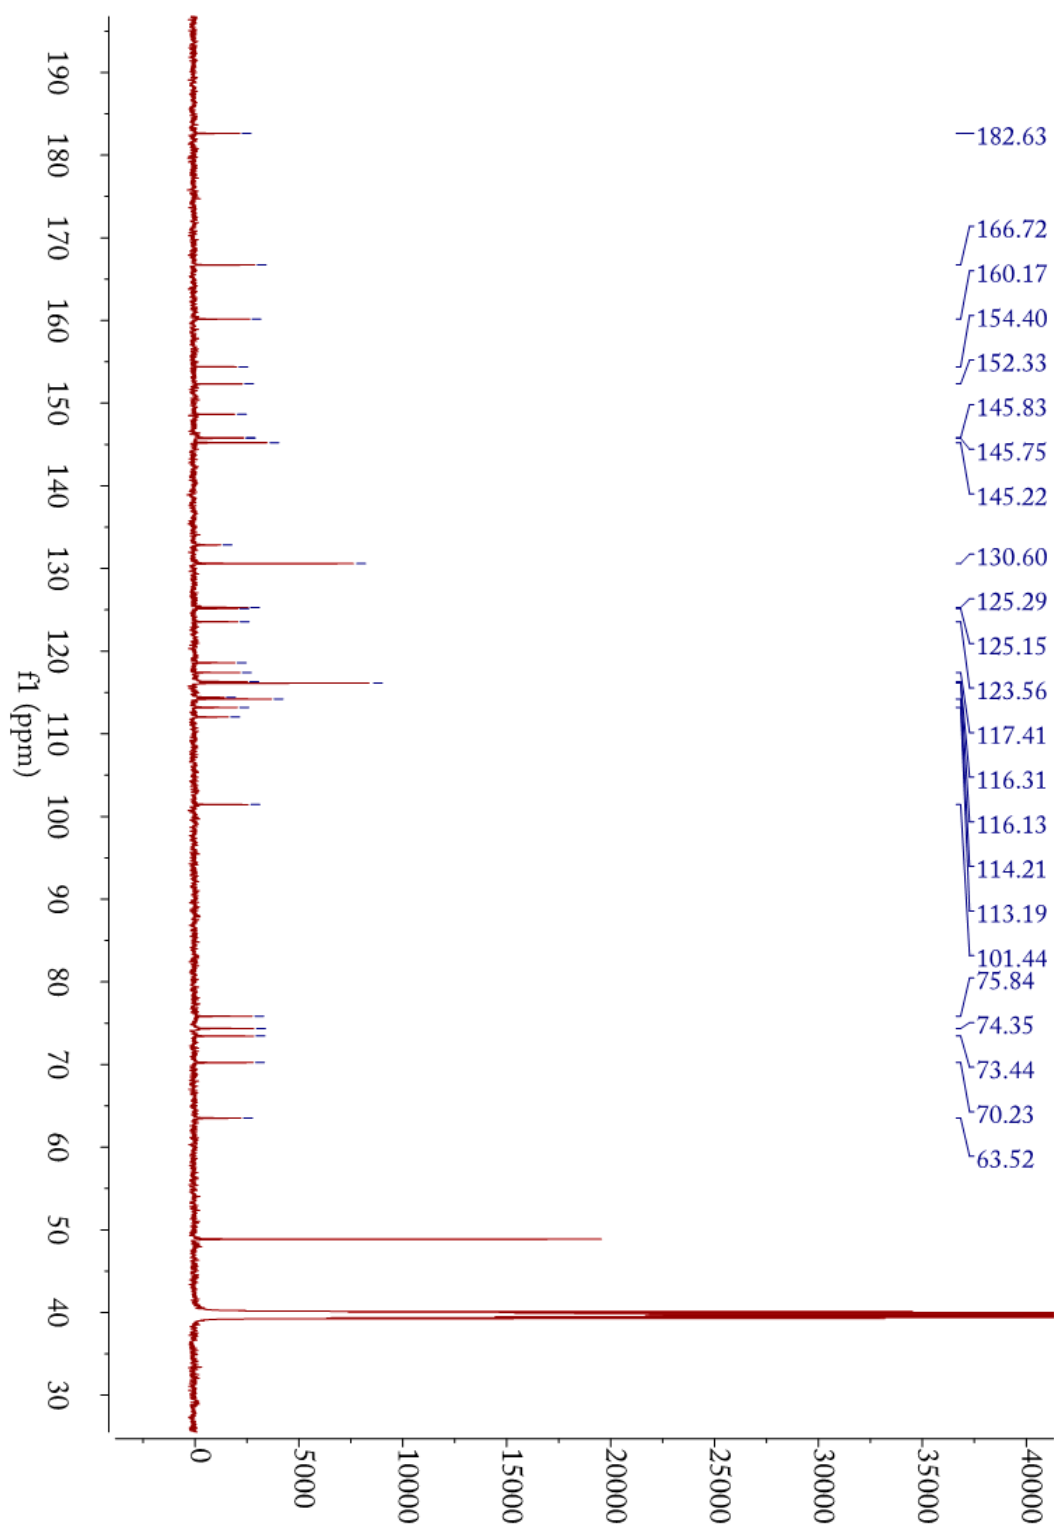

**Figure S18.**  $^{13}\text{C}$ -NMR spectrum of compound **3** (150 MHz, in  $\text{DMSO-}d_6$ ).

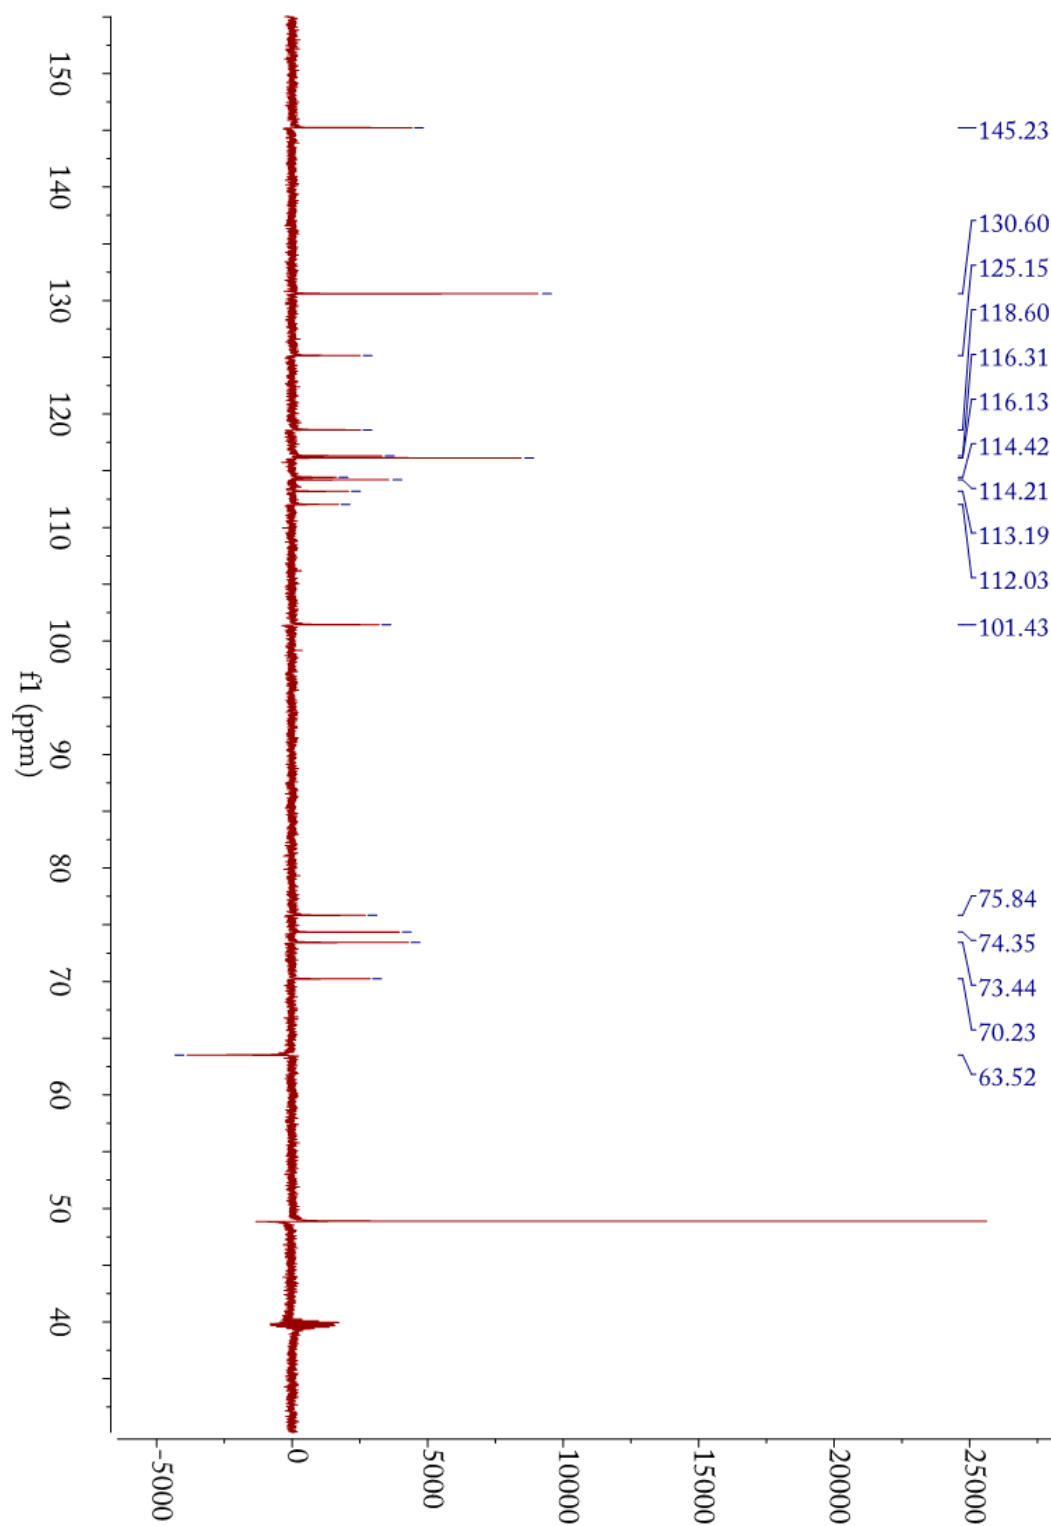

**Figure S19.** DEPT spectrum of compound **3** (150 MHz, in DMSO-*d*<sub>6</sub>).

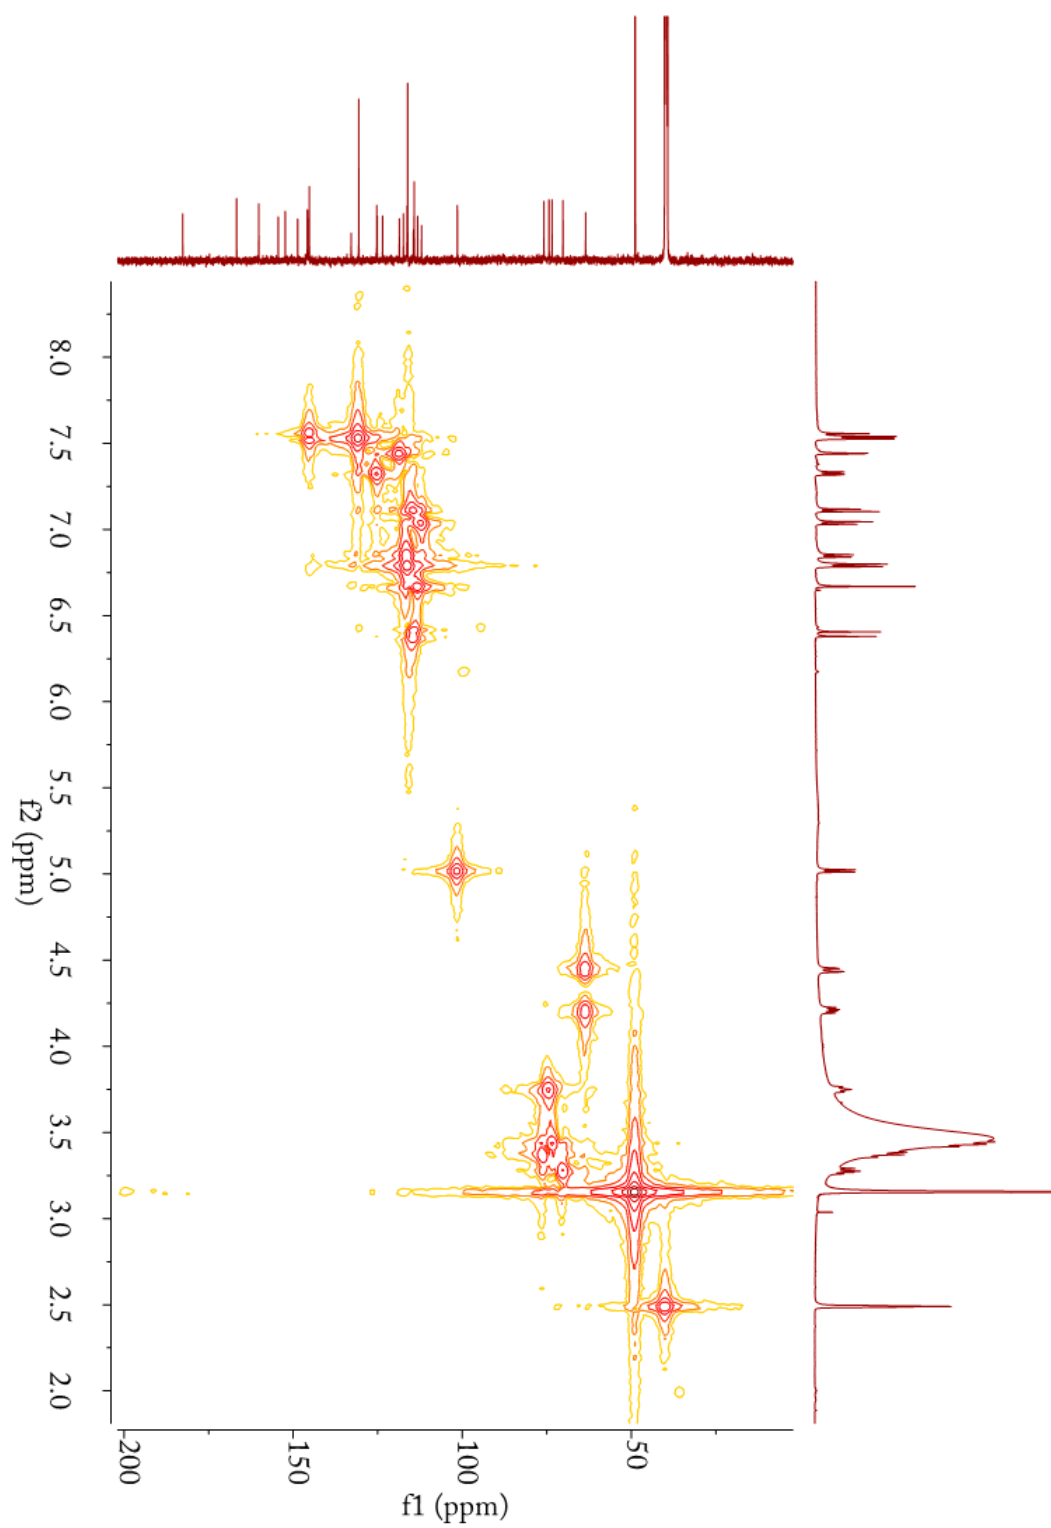

**Figure S20.** HSQC spectrum of compound **3** (600 MHz, in DMSO-*d*<sub>6</sub>).

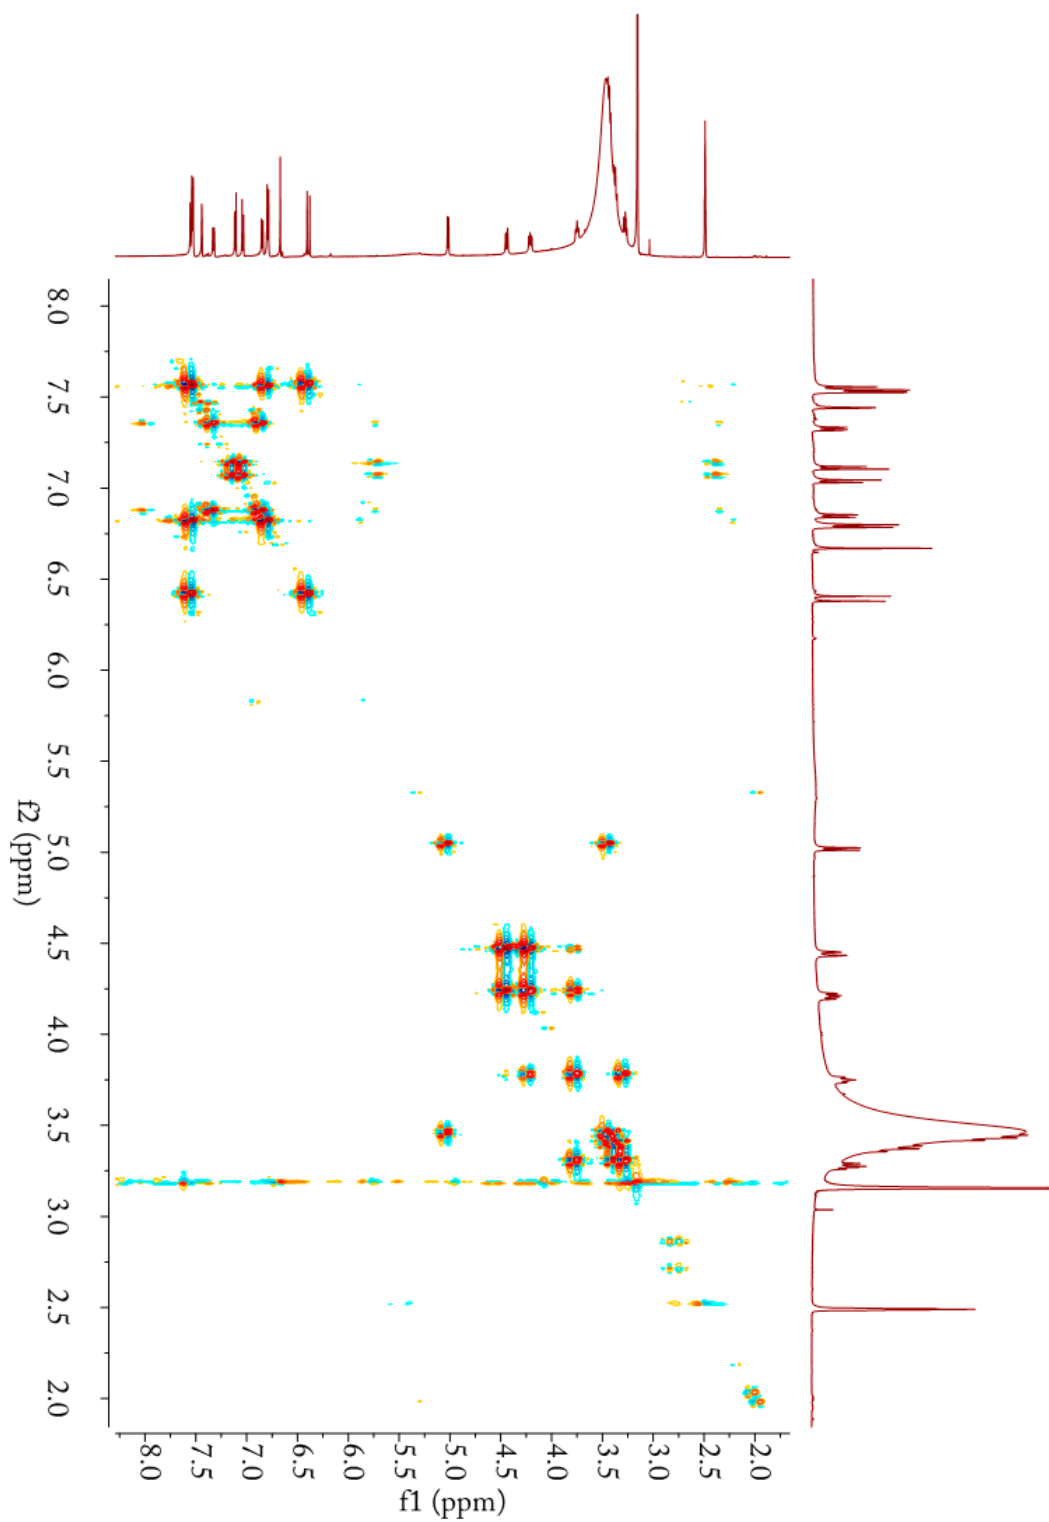

**Figure S21.**  $^1\text{H}$ - $^1\text{H}$  COSY spectrum of compound **3** (600 MHz, in  $\text{DMSO-}d_6$ ).

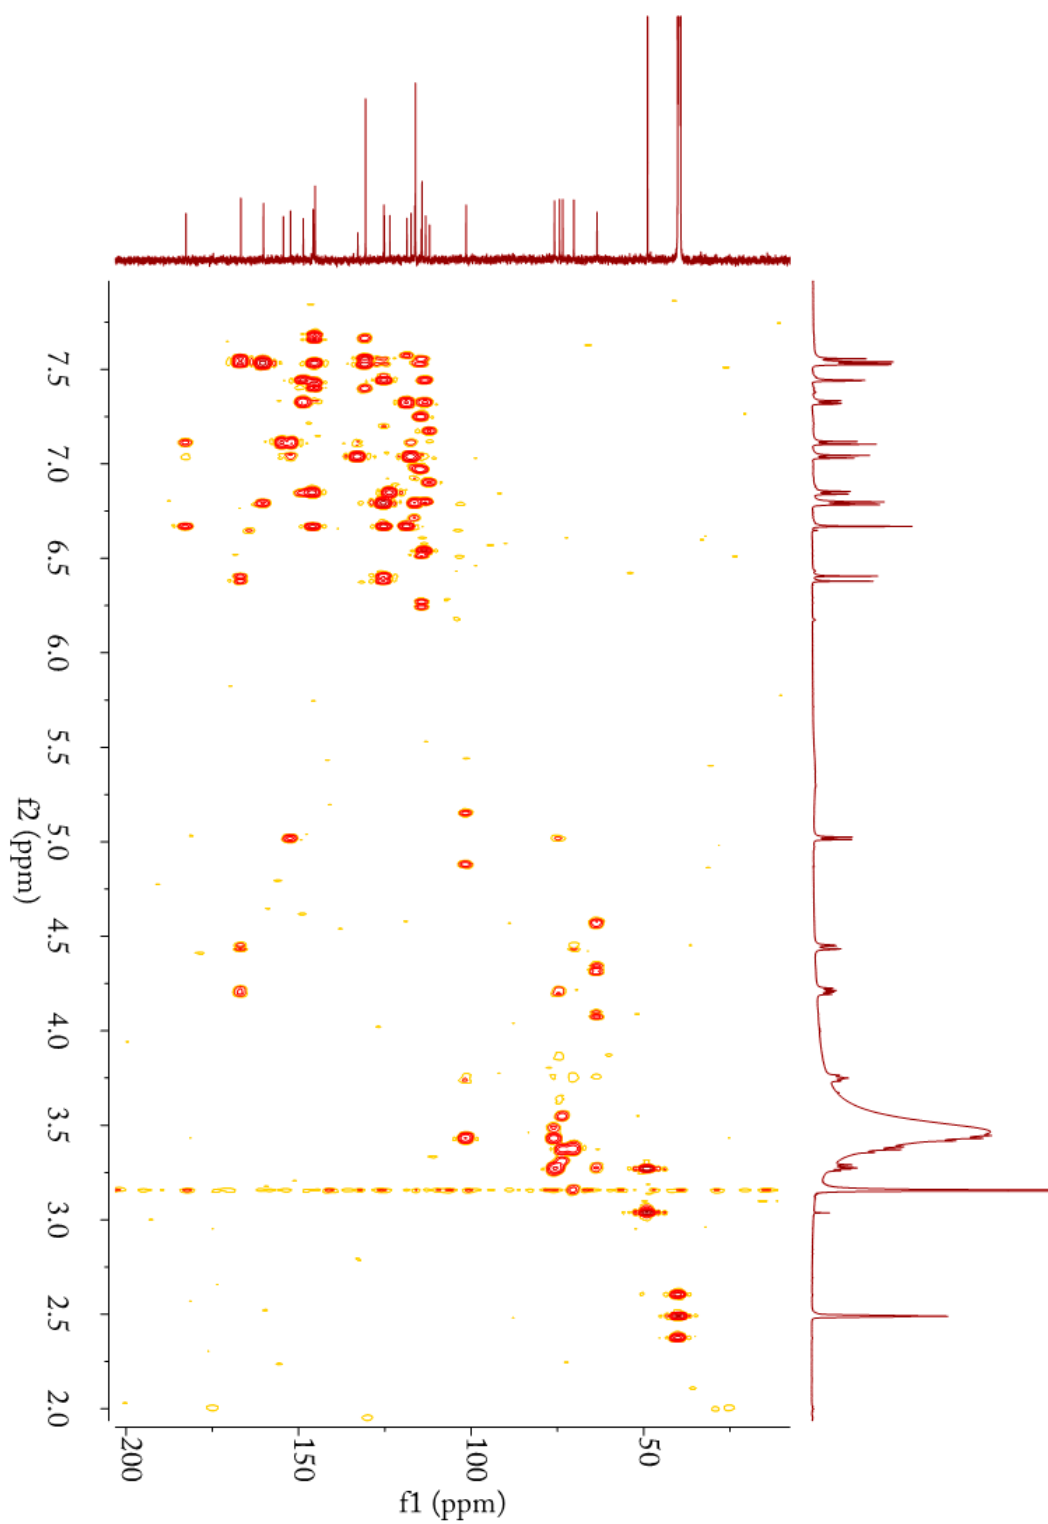

**Figure S22.** HMBC spectrum of compound **3** (600 MHz, in DMSO-*d*<sub>6</sub>).

Mobile phase of HPLC-DAD analysis for compounds **1**, **2**, **3**, **9**, **15**, **21**, **24**, **51** and EtOH extract of *B. frondosa* with Diamonsil C18 column (250 mm × 4.6 mm, 5.0 μm, Dikma Technologies, Beijing, China)

| No. | Time (min) | CH <sub>3</sub> OH (%) | 0.1% Aqueous Formic Acid (%) | Flow (mL/min) |
|-----|------------|------------------------|------------------------------|---------------|
| 1   | 0.00       | 10.0                   | 90.0                         | 0.10          |
|     | 30.00      | 100.0                  | 0.0                          | 0.10          |
| 2   | 0.00       | 20.0                   | 80.0                         | 0.10          |
|     | 80.00      | 100.0                  | 0.0                          | 0.10          |

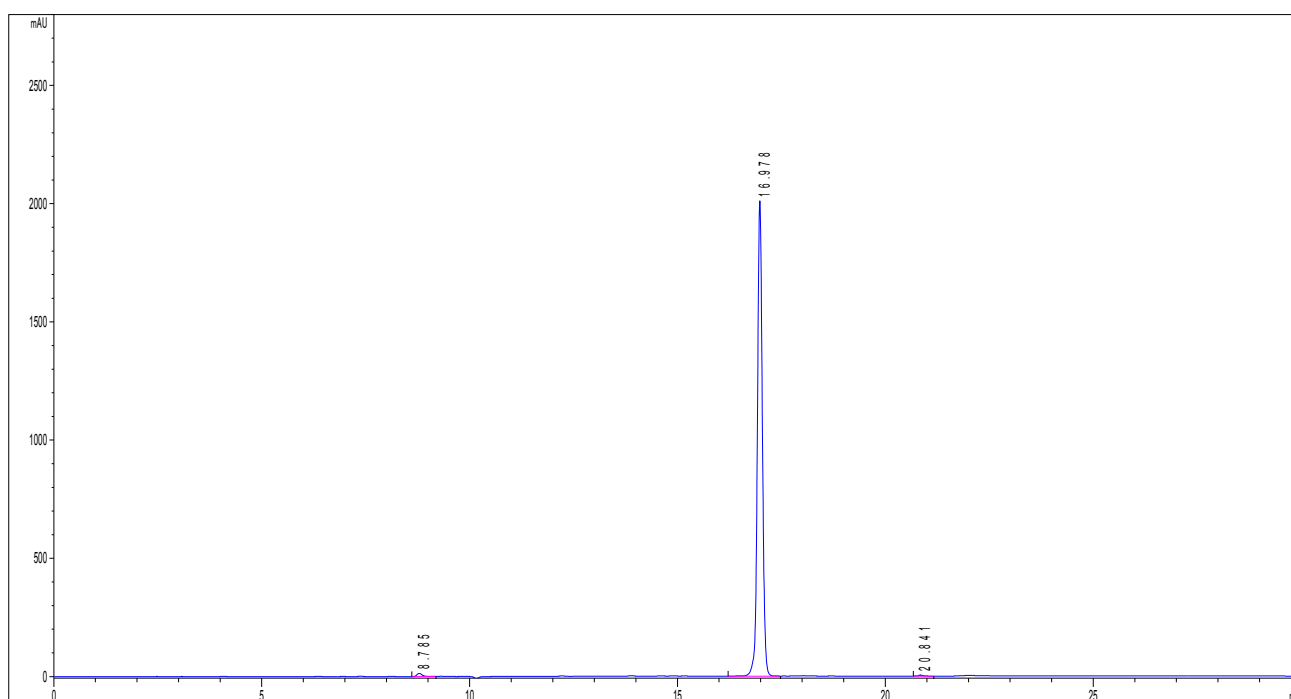

| No. | Time   | Area    | Height | Width  | Area%  |
|-----|--------|---------|--------|--------|--------|
| 2   | 16.978 | 16638.5 | 2011   | 0.1265 | 99.057 |

**Figure S23.** HPLC profile of compound 1. Mobile phase of 0 min 10% MeOH–30 min 100% MeOH, Time = 30 min.



(a)

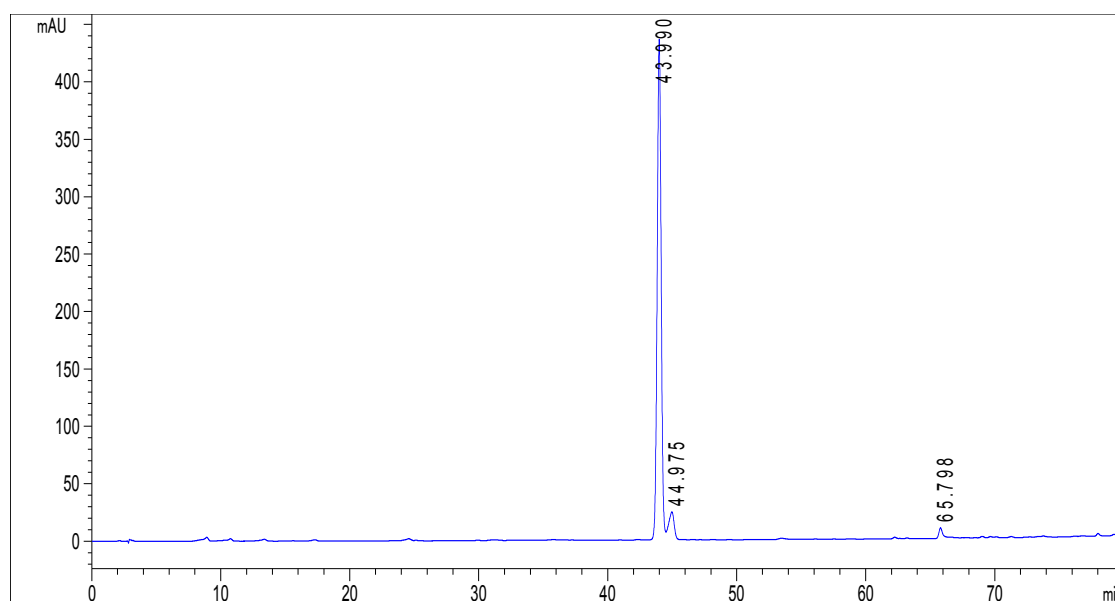

| No. | Time  | Area   | Height | Width  | Area%  |
|-----|-------|--------|--------|--------|--------|
| 1   | 43.99 | 9331.9 | 435.9  | 0.3313 | 91.239 |

(b)

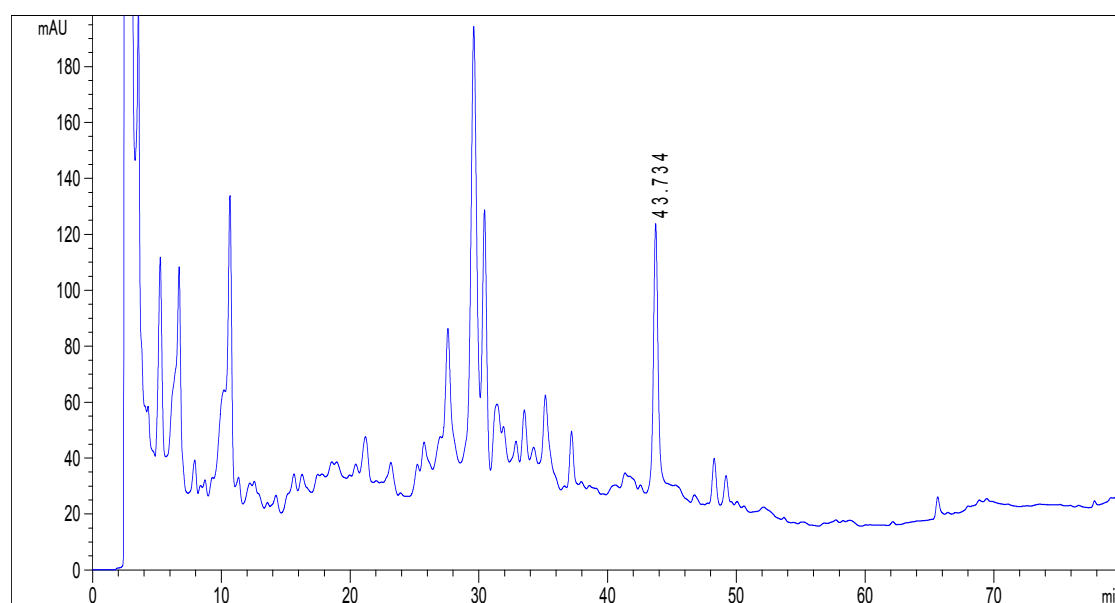

| No. | Time   | Area   | Height | Width  | Area% |
|-----|--------|--------|--------|--------|-------|
| 44  | 43.734 | 2421.2 | 95.3   | 0.3866 | 5.307 |

**Figure S24.** HPLC profiles of compound 2 (a) and EtOH extract of *B. frondosa* (b). Mobile phase of 0 min 20% MeOH–80 min 100% MeOH, Time = 80 min. Compound 2 is a natural chemical constituent, which is identified by HPLC.

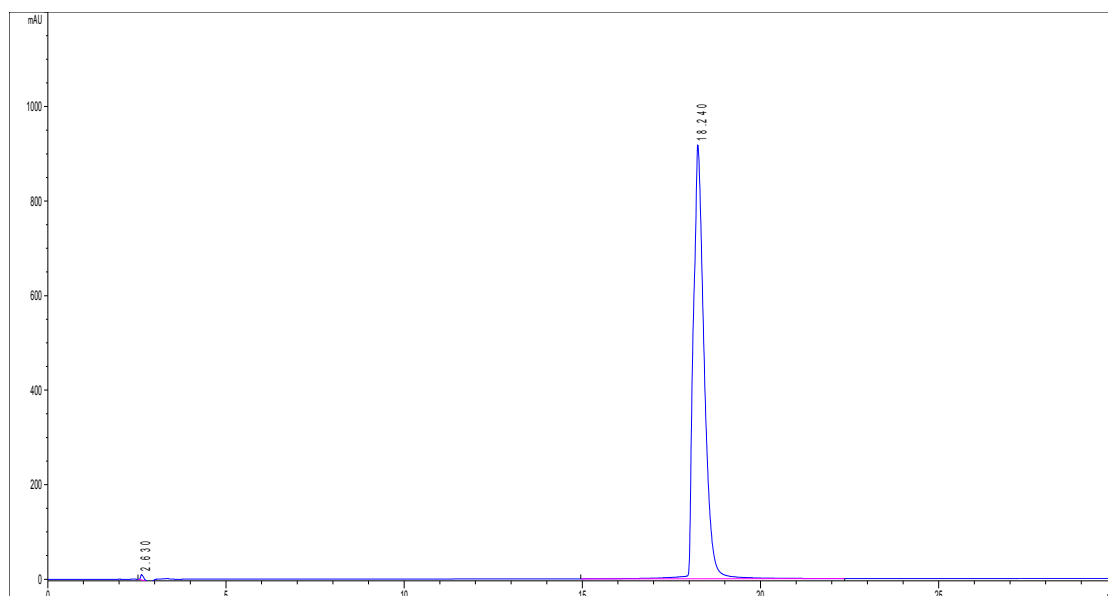

| No. | Time  | Area  | Height | Width  | Area%  |
|-----|-------|-------|--------|--------|--------|
| 2   | 18.24 | 19459 | 917.3  | 0.2955 | 99.662 |

**Figure S25.** HPLC profile of compound 3. Mobile phase of 0 min 10% MeOH–30 min 100% MeOH, Time = 30 min.

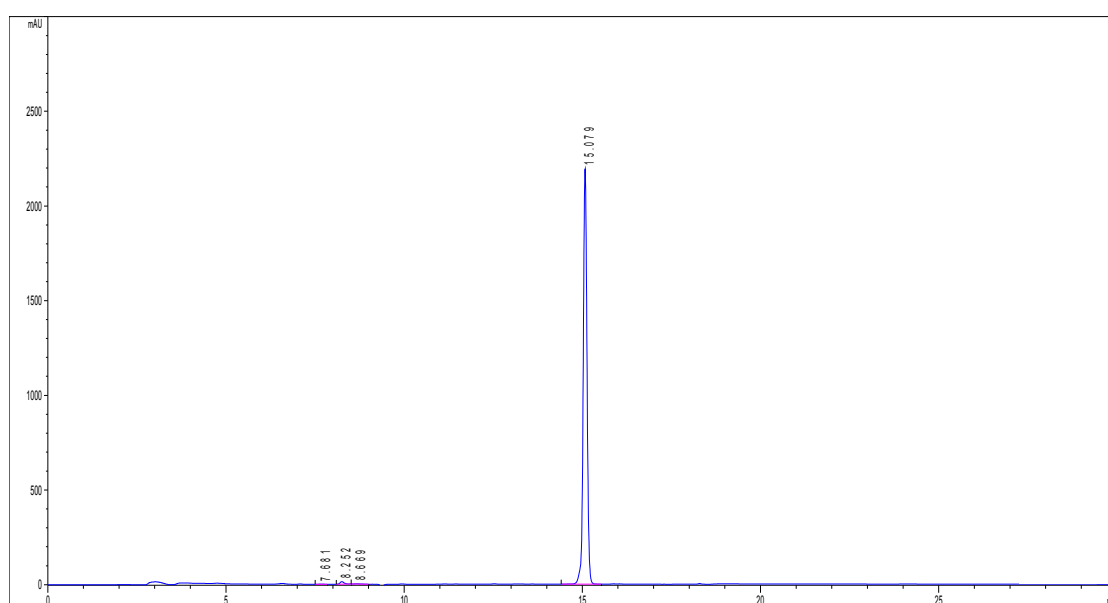

| No. | Time   | Area    | Height | Width  | Area%  |
|-----|--------|---------|--------|--------|--------|
| 4   | 15.079 | 16115.4 | 2195.6 | 0.1136 | 99.167 |

**Figure S26.** HPLC profile of compound 9. Mobile phase of 0 min 10% MeOH–30 min 100% MeOH, Time = 30 min.

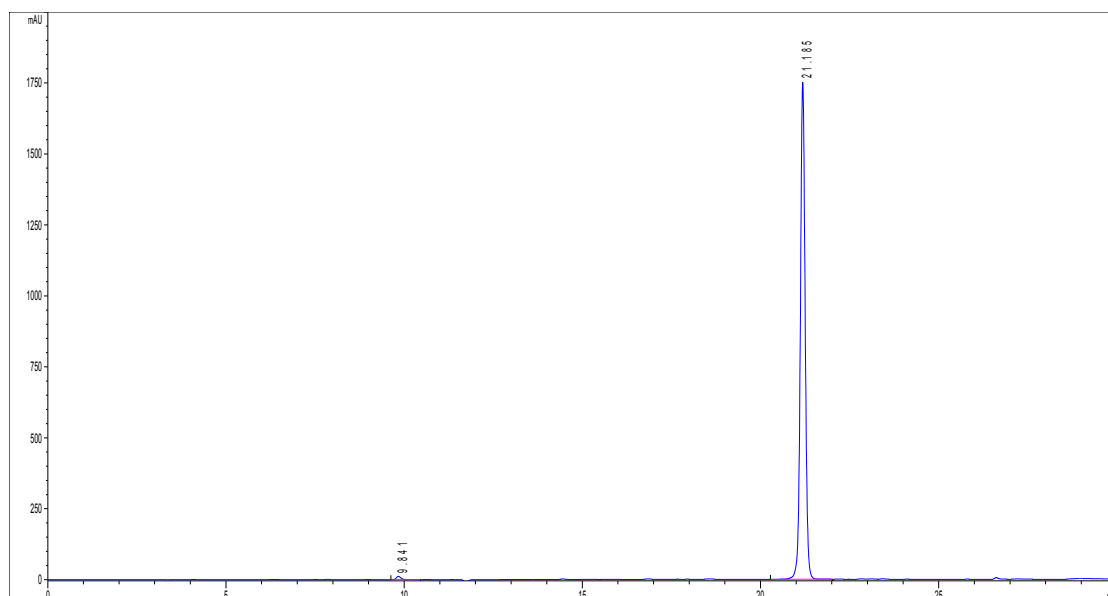

| No. | Time   | Area    | Height | Width  | Area%  |
|-----|--------|---------|--------|--------|--------|
| 2   | 21.185 | 16489.1 | 1751   | 0.1459 | 99.293 |

**Figure S27.** HPLC profile of compound **15**. Mobile phase of 0 min 10% MeOH–30 min 100% MeOH, Time =30 min.

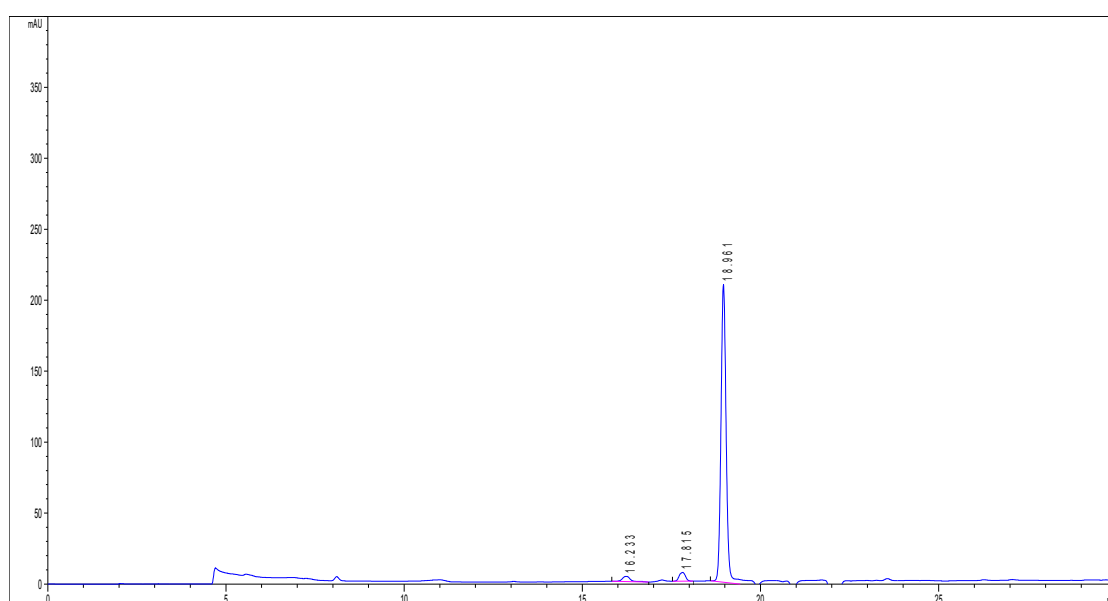

| No. | Time   | Area   | Height | Width  | Area%  |
|-----|--------|--------|--------|--------|--------|
| 3   | 18.961 | 2189.7 | 209.8  | 0.1597 | 94.127 |

**Figure S28.** HPLC profile of compound **21**. Mobile phase of 0 min 10% MeOH–30 min 100% MeOH, Time =30 min.

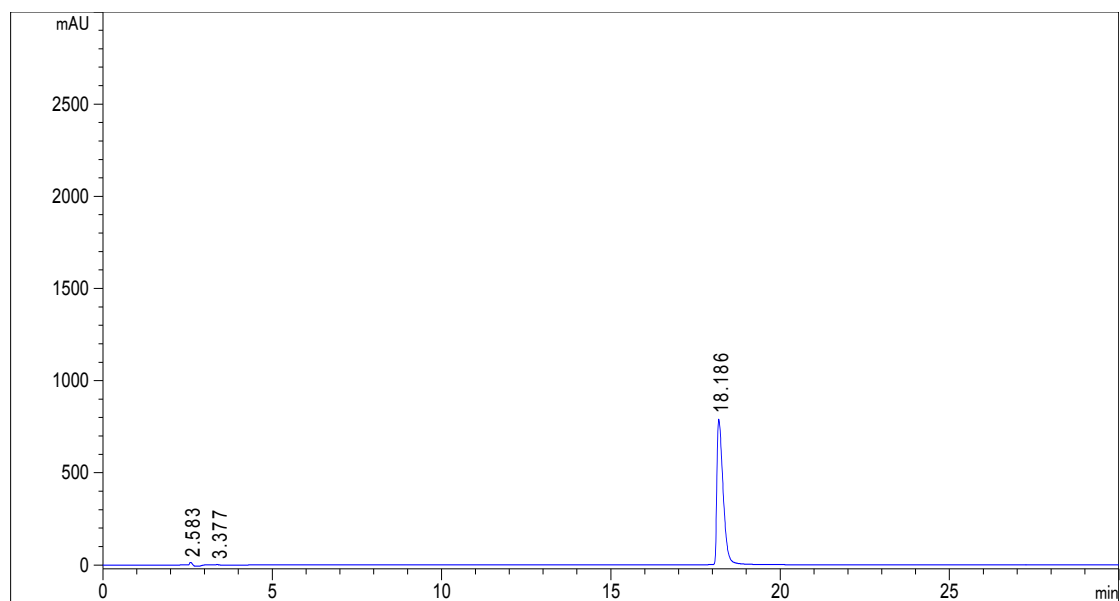

| No. | Time   | Area    | Height | Width  | Area%  |
|-----|--------|---------|--------|--------|--------|
| 3   | 18.186 | 10208.7 | 790.4  | 0.1967 | 97.939 |

**Figure S29.** HPLC profile of compound **24**. Mobile phase of 0 min 10% MeOH–30 min 100% MeOH, Time =30 min.

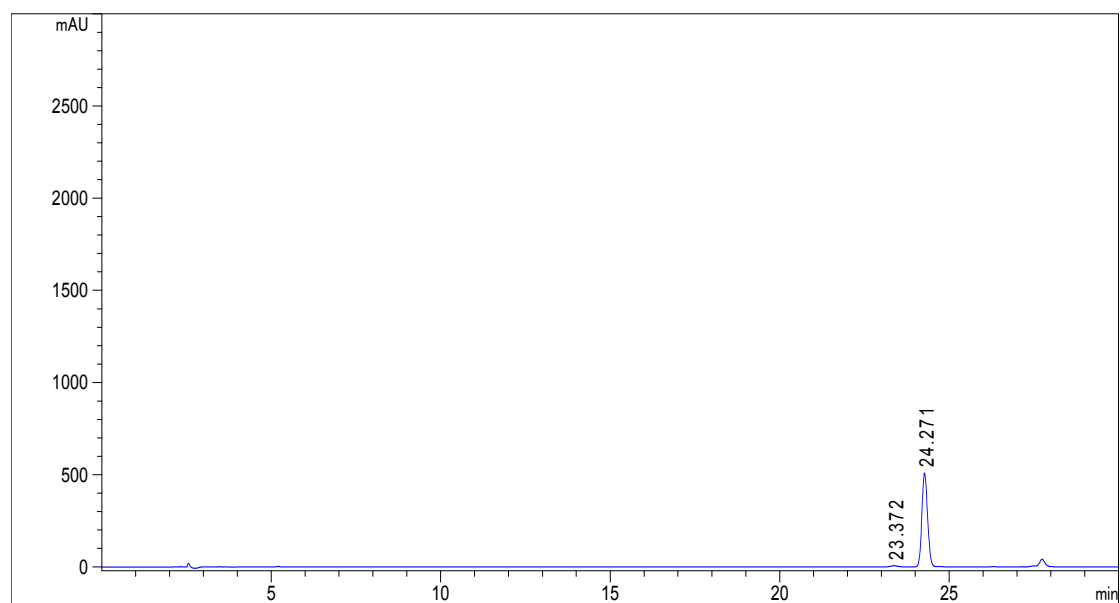

| No. | Time   | Area   | Height | Width | Area%  |
|-----|--------|--------|--------|-------|--------|
| 2   | 24.271 | 6150.1 | 565.5  | 0.179 | 97.089 |

**Figure S30.** HPLC profile of compound **51**. Mobile phase of 0 min 10% MeOH–30 min 100% MeOH, Time =30 min.

**Table S1.** Inhibitory effects of compounds **1–34, 36, 39, 43, 47, 51, 52** (1, 10, 100 µg/mL) on NF-κB in luciferase activity assay.

| Compound | Cell                | LPS                | Compound + LPS      |                       |                       |
|----------|---------------------|--------------------|---------------------|-----------------------|-----------------------|
|          |                     |                    | C-1 µg/mL           | C-10 µg/mL            | C-100 µg/mL           |
| 1        | 2132.00 ± 281.13 ** | 73268.00 ± 4999.01 | 65479.00 ± 2675.95  | 62319.67 ± 4230.77 *  | 59421.67 ± 4993.19 *  |
| 2        | 2132.00 ± 281.13 ** | 73268.00 ± 4999.01 | 66488.00 ± 3148.37  | 62489.67 ± 3724.55 *  | 56398.67 ± 4119.77    |
| 3        | 2132.00 ± 281.13 ** | 73268.00 ± 4999.01 | 68896.00 ± 3696.88  | 62387.67 ± 3843.46 *  | 59076.33 ± 6732.61 *  |
| 4        | 2132.00 ± 281.13 ** | 73268.00 ± 4999.01 | 68333.00 ± 5552.84  | 65038.67 ± 5021.67    | 62632.00 ± 4289.43 *  |
| 5        | 2132.00 ± 281.13 ** | 73268.00 ± 4999.01 | 69027.00 ± 4565.20  | 61769.67 ± 4480.88 *  | 58630.67 ± 2551.23 ** |
| 6        | 2132.00 ± 281.13 ** | 73268.00 ± 4999.01 | 68977.33 ± 4635.98  | 65313.00 ± 3016.18    | 60990.67 ± 3209.34 *  |
| 7        | 2132.00 ± 281.13 ** | 73268.00 ± 4999.01 | 68038.67 ± 4100.52  | 67432.00 ± 6221.41    | 64396.67 ± 5314.31    |
| 8        | 2132.00 ± 281.13 ** | 73268.00 ± 4999.01 | 69060.00 ± 4137.77  | 64708.00 ± 2633.98    | 60614.67 ± 4016.71 *  |
| 9        | 2132.00 ± 281.13 ** | 73268.00 ± 4999.01 | 62253.33 ± 3875.6 * | 56677.33 ± 5258.80 *  | 45549.67 ± 8023.69 ** |
| 10       | 2132.00 ± 281.13 ** | 73268.00 ± 4999.01 | 67950.33 ± 4247.37  | 67385.67 ± 3348.19    | 58837.00 ± 6131.49 *  |
| 11       | 2132.00 ± 281.13 ** | 73268.00 ± 4999.01 | 65528.00 ± 4876.20  | 64122.33 ± 3531.52    | 59963.67 ± 3575.50 *  |
| 12       | 2132.00 ± 281.13 ** | 73268.00 ± 4999.01 | 67828.33 ± 4365.55  | 63674.33 ± 4035.83    | 53432.00 ± 4547.24 ** |
| 13       | 2132.00 ± 281.13 ** | 73268.00 ± 4999.01 | 69319.33 ± 4163.59  | 65280.67 ± 4343.88    | 56975.67 ± 5995.17 *  |
| 14       | 2132.00 ± 281.13 ** | 73268.00 ± 4999.01 | 68371.33 ± 5603.29  | 63247.67 ± 3694.65 *  | 58347.33 ± 4447.21 *  |
| 15       | 2132.00 ± 281.13 ** | 73268.00 ± 4999.01 | 59902.00 ± 5734.5 * | 58715.33 ± 4789.37 *  | 35417.00 ± 7285.47 ** |
| 16       | 2132.00 ± 281.13 ** | 73268.00 ± 4999.01 | 69980.67 ± 4109.9   | 67088.67 ± 2854.42    | 63264.67 ± 4006.62    |
| 17       | 2132.00 ± 281.13 ** | 73268.00 ± 4999.01 | 68069.33 ± 2254.6   | 64314.67 ± 3788.37    | 59662.67 ± 4631.43*   |
| 18       | 2132.00 ± 281.13 ** | 73268.00 ± 4999.01 | 65444.67 ± 2904.9   | 60307.00 ± 3656.06 *  | 56705.00 ± 5944.80*   |
| 19       | 2132.00 ± 281.13 ** | 73268.00 ± 4999.01 | 65878.00 ± 3992.27  | 64450.67 ± 3680.85    | 55090.33 ± 4504.16**  |
| 20       | 2132.00 ± 281.13 ** | 73268.00 ± 4999.01 | 69457.00 ± 2955.76  | 65315.33 ± 2724.70    | 58030.00 ± 5092.78 *  |
| 21       | 2132.00 ± 281.13 ** | 73268.00 ± 4999.01 | 61918.33 ± 3548.9 * | 50924.00 ± 3502.17 ** | 45476.00 ± 8498.07 ** |
| 22       | 2132.00 ± 281.13 ** | 73268.00 ± 4999.01 | 58070.00 ± 4334.8 * | 51643.33 ± 6534.49 *  | 40122.67 ± 4886.15 ** |
| 23       | 2132.00 ± 281.13 ** | 73268.00 ± 4999.01 | 65622.00 ± 3349.58  | 66220.33 ± 5212.61    | 59923.33 ± 6084.11 *  |
| 24       | 2132.00 ± 281.13 ** | 73268.00 ± 4999.01 | 65046.00 ± 4545.51  | 64802.33 ± 4082.00    | 59672.67 ± 3753.96 *  |
| 25       | 2132.00 ± 281.13**  | 73268.00 ± 4999.01 | 66629.67 ± 3227.20  | 63780.33 ± 4066.85    | 63819.67 ± 4675.25    |

Table S1. Cont.

| Compound         | Cell                | LPS                | Compound + LPS       |                       |                       |
|------------------|---------------------|--------------------|----------------------|-----------------------|-----------------------|
|                  |                     |                    | C-1 µg/mL            | C-10 µg/mL            | C-100 µg/mL           |
| 26               | 2132.00 ± 281.13 ** | 73268.00 ± 4999.01 | 65229.67 ± 4410.53   | 64029.00 ± 4013.51    | 59010.00 ± 5472.91 *  |
| 27               | 2132.00 ± 281.13 ** | 73268.00 ± 4999.01 | 66429.00 ± 3131.58   | 60575.00 ± 4677.45 *  | 57566.33 ± 4433.86 *  |
| 28               | 2132.00 ± 281.13 ** | 73268.00 ± 4999.01 | 67093.00 ± 3899.88   | 65215.00 ± 2716.62    | 59226.00 ± 5025.35 *  |
| 29               | 2132.00 ± 281.13 ** | 73268.00 ± 4999.01 | 67276.00 ± 3507.74   | 63942.33 ± 3294.88    | 59497.33 ± 4052.66 *  |
| 30               | 2132.00 ± 281.13 ** | 73268.00 ± 4999.01 | 67418.00 ± 4181.95   | 64804.67 ± 3725.58    | 59233.67 ± 4645.91 *  |
| 31               | 2132.00 ± 281.13 ** | 73268.00 ± 4999.01 | 67722.33 ± 2772.07   | 64602.67 ± 3300.97    | 58969.00 ± 4565.26 *  |
| 32               | 2132.00 ± 281.13 ** | 73268.00 ± 4999.01 | 69157.00 ± 4731.34   | 63617.00 ± 4047.05    | 59162.67 ± 4481.74 *  |
| 33               | 2132.00 ± 281.13 ** | 73268.00 ± 4999.01 | 67359.00 ± 3514.87   | 64555.67 ± 4021.52    | 56640.00 ± 4919.46 *  |
| 34               | 2132.00 ± 281.13 ** | 73268.00 ± 4999.01 | 68007.67 ± 4107.68   | 63242.33 ± 4638.23    | 52565.67 ± 4279.69 ** |
| 36               | 2132.00 ± 281.13 ** | 73268.00 ± 4999.01 | 70055.33 ± 4111.44   | 64733.33 ± 4174.56    | 59247.00 ± 4648.29 *  |
| 39               | 2132.00 ± 281.13 ** | 73268.00 ± 4999.01 | 67420.00 ± 3259.34   | 62314.00 ± 4492.91 *  | 57646.67 ± 3659.60 *  |
| 43               | 2132.00 ± 281.13 ** | 73268.00 ± 4999.01 | 66801.00 ± 3696.52   | 64209.3 ± 3814.68     | 59015.00 ± 4434.44 *  |
| 47               | 2132.00 ± 281.13 ** | 73268.00 ± 4999.01 | 68683.33 ± 4069.28   | 63742.67 ± 3990.68    | 62942.00 ± 4080.98    |
| 51               | 2132.00 ± 281.13 ** | 73268.00 ± 4999.01 | 61368.33 ± 3827.01 * | 51393.67 ± 5605.39 ** | 38543.67 ± 7726.72 ** |
| 52               | 2132.00 ± 281.13 ** | 73268.00 ± 4999.01 | 65899.00 ± 2711.02 * | 62089.00 ± 5475.50 ** | 53650.00 ± 3463.12 ** |
| <b>Ibuprofen</b> | 2132.00 ± 281.13 ** | 73268.00 ± 4999.01 | 63530.33 ± 4994.17   | 60789.67 ± 4489.31 *  | 36894.67 ± 6013.18 ** |

\*\*  $p < 0.01$ , \*  $p < 0.05$  versus LPS-treated group. Data presented is the mean ± S.D. of samples run in triplicate.
